# Supplementary material
Source: PubMed Central journal article supplement (PMC4674393)

## **Supporting Information**

### **Clinicopathological indices to predict hepatocellular carcinoma molecular classification**

Poh Seng Tan, Shigeki Nakagawa, Nicolas Goossens, Anu Venkatesh, Tiangui Huang, Stephen C. Ward, Xiaochen Sun, Won-Min Song, Anna Koh, Claudia Canasto-Chibuque, Manjeet Deshmukh, Venugopalan Nair, Milind Mahajan, Bin Zhang, Maria Isabel Fiel, Masahiro Kobayashi, Hiromitsu Kumada, Yujin Hoshida

## Contents

**Table S1.** The 30-gene HCC molecular classification signature.

**Table S2.** Summary of clinical demographics in 9 HCC datasets used for evaluation of HCC subclass predictive performance of the 30-gene signature compared to the 619-gene signature.

**Table S3.** RT-qPCR primers.

**Table S4.** Liver cancer-related gene signatures in literature.

**Table S5.** Concordance of histopathological determination between evaluators.

**Table S6.** HCC molecular subclasses and tumor characteristics of SH-HCC and non-SH-HCC variants.

**Table S7.** Gene sets associated with histopathological features in the validation set (Gene Set Enrichment Analysis: GSEA).

**Table S8.** Key driver genes in gene regulatory network modules (Planar Filtered Network Analysis, Key Driver Analysis: PFNA).

**Table S9.** Gene regulatory network modules associated with histopathological features in the validation set.

**Table S10.** Prognostic association of HCC molecular subclasses.

**Table S11.** Performance of clinicopathological indices predictive of HCC molecular subclass.

**Table S12.** Required sample size in clinical trial and NNT in HCC molecular subclass-targeting therapy.

**Table S13.** Prognostic association of clear cell variant in literature.

**Figure S1.** Study design.

**Figure S2.** Concordance of HCC molecular subclass prediction between the full 619-gene signature and reduced 30-gene signature.

**Figure S3.** Induction of YAP target genes in S2 subclass (GSEA).

**Figure S4.** The macrotrabecular/compact pattern-associated gene regulatory network modules (A: no.22, B: no.15) identified by Planar Filtered Network Analysis (PFNA).

**Figure S5.** The pseudoglandular pattern-associated gene regulatory network module (no.56) identified by Planar Filtered Network Analysis (PFNA).

**Figure S6.** The steatohepatic hepatocellular carcinoma (SH-HCC) variant-associated gene

regulatory network module (no.6) identified by PFNA.

**Figure S7.** Serum AFP levels according to HCC molecular subclasses in the training set.

**Figure S8.** Correlation of clinicopathological features with HCC molecular subclasses (univariable logistic regression analysis). (A: Training set, B: Validation set)

**Figure S9.** Receiver operating characteristic (ROC) curves for the S1, S2, and S3 subclass predictive indices based on clinicopathological features.

**Figure S10.** Required sample size in clinical trial and NNT in HCC molecular subclass-targeting therapy.

**Table S1**

The 30-gene HCC molecular classification signature.

| Subclass | GeneID | Symbol   | Description                                                                                                                             |
|----------|--------|----------|-----------------------------------------------------------------------------------------------------------------------------------------|
| S1       | 8826   | IQGAP1   | IQ motif containing GTPase activating protein 1                                                                                         |
| S1       | 6282   | S100A11  | S100 calcium binding protein A11 (calgizzarin)                                                                                          |
| S1       | 11031  | RAB31    | RAB31, member RAS oncogene family                                                                                                       |
| S1       | 951    | CD37     | CD37 molecule                                                                                                                           |
| S1       | 10631  | POSTN    | periostin, osteoblast specific factor                                                                                                   |
| S1       | 397    | ARHGDI3  | Rho GDP dissociation inhibitor (GDI) beta                                                                                               |
| S1       | 241    | ALOX5AP  | arachidonate 5-lipoxygenase-activating protein                                                                                          |
| S1       | 7805   | LAPTM5   | lysosomal associated multispinning membrane protein 5                                                                                   |
| S1       | 1462   | CSPG2    | chondroitin sulfate proteoglycan 2 (versican)                                                                                           |
| S1       | 10109  | ARPC2    | actin related protein 2/3 complex, subunit 2, 34kDa                                                                                     |
| S2       | 1280   | COL2A1   | collagen, type II, alpha 1 (primary osteoarthritis, spondyloepiphyseal dysplasia, congenital)                                           |
| S2       | 2719   | GPC3     | glypican 3                                                                                                                              |
| S2       | 174    | AFP      | alpha-fetoprotein                                                                                                                       |
| S2       | 191    | AHCY     | S-adenosylhomocysteine hydrolase                                                                                                        |
| S2       | 6894   | TARBP1   | Tar (HIV-1) RNA binding protein 1                                                                                                       |
| S2       | 1820   | ARID3A   | AT rich interactive domain 3A (BRIGHT- like)                                                                                            |
| S2       | 2261   | FGFR3    | fibroblast growth factor receptor 3 (achondroplasia, thanatophoric dwarfism)                                                            |
| S2       | 6599   | SMARCC1  | SWI/SNF related, matrix associated, actin dependent regulator of chromatin, subfamily c, member 1                                       |
| S2       | 6193   | RPS5     | ribosomal protein S5                                                                                                                    |
| S2       | 1974   | EIF4A2   | eukaryotic translation initiation factor 4A, isoform 2                                                                                  |
| S3       | 10249  | GLYAT    | glycine-N-acyltransferase                                                                                                               |
| S3       | 462    | SERPINC1 | serpin peptidase inhibitor, clade C (antithrombin), member 1                                                                            |
| S3       | 346    | APOC4    | apolipoprotein C-IV                                                                                                                     |
| S3       | 4522   | MTHFD1   | methylenetetrahydrofolate dehydrogenase (NADP+ dependent) 1, methenyltetrahydrofolate cyclohydrolase, formyltetrahydrofolate synthetase |
| S3       | 2875   | GPT      | glutamic-pyruvate transaminase (alanine aminotransferase)                                                                               |
| S3       | 3242   | HPD      | 4-hydroxyphenylpyruvate dioxygenase                                                                                                     |
| S3       | 710    | SERPINC1 | serpin peptidase inhibitor, clade G (C1 inhibitor), member 1, (angioedema, hereditary)                                                  |
| S3       | 1798   | DPAGT1   | dolichyl-phosphate (UDP-N-acetylglucosamine) N-acetylglucosaminophosphotransferase 1 (GlcNAc-1-P transferase)                           |
| S3       | 5105   | PCK1     | phosphoenolpyruvate carboxykinase 1 (soluble)                                                                                           |
| S3       | 3081   | HGD      | homogentisate 1,2-dioxygenase (homogentisate oxidase)                                                                                   |

**Table S2**

Summary of clinical demographics in 9 HCC datasets used for evaluation of HCC subclass predictive performance of the 30-gene signature compared to the 619-gene signature.

|                       | HCC-A                         | HCC-B                           | HCC-C                                  | HCC-D                               | HCC-E                           | HCC-F                        | HCC-G                              | HCC-H                            | HCC-I                                        |
|-----------------------|-------------------------------|---------------------------------|----------------------------------------|-------------------------------------|---------------------------------|------------------------------|------------------------------------|----------------------------------|----------------------------------------------|
| No. of samples        | 90                            | 82                              | 60                                     | 43                                  | 33                              | 31                           | 57                                 | 89                               | 118                                          |
| Sex (male %)          | 79%                           | na                              | 73%                                    | na                                  | 97%                             | 68%                          | 82%                                | 58%                              | 81%                                          |
| Age                   | 53 (12)                       | na                              | 63                                     | na                                  | 51 (10)                         | 64 (8)                       | 62 (14)                            | 65 (9)                           | 58 (9)                                       |
| Etiology              |                               |                                 |                                        |                                     |                                 |                              |                                    |                                  |                                              |
| HBV                   | 59%                           | 83%                             | 18%                                    | 14%                                 | 97%                             | 32%                          | 30%                                | -                                | 23%                                          |
| HCV                   | 9%                            | 5%                              | 67%                                    | 26%                                 | -                               | 68%                          | 19%                                | 100%                             | 69%                                          |
| HBV+HCV               | 3%                            | -                               | -                                      | -                                   | -                               | -                            | -                                  | -                                | 1%                                           |
| Alcohol               | 6%                            | -                               | -                                      | 12%                                 | -                               | -                            | 32%                                | -                                | 3%                                           |
| Others                | 4%                            | 11%                             | 15%                                    | 2%                                  | 3%                              | -                            | 5%                                 | -                                | -                                            |
| Cirrhosis             | 50%                           | na                              | 60                                     | na                                  | 82%                             | na                           | 63%                                | na                               | 70%                                          |
| Tumor stage           | na                            | na                              | I / II / IIIA <sup>*</sup><br>22/28/10 | na                                  | na                              | na                           | na                                 | 0/A/B/C <sup>†</sup><br>9/57/5/8 | I / II / III / IV <sup>*</sup><br>35/55/12/4 |
| Histology             | G2/3/4 <sup>‡</sup><br>8/31/1 | na                              | G1/2/3 <sup>‡</sup><br>4/45/10         | G1/2/3/4 <sup>‡</sup><br>10/22/10/1 | M/M+P/P <sup>†</sup><br>11/19/2 | W/M/P <sup>§</sup> 10/13/8   | G1/2/3/4 <sup>‡</sup><br>7/51/35/7 | W/M/P <sup>§</sup><br>20/41/17   | W/M/P <sup>§</sup><br>24/65/16               |
| Tumor size (cm)       | na                            | na                              | 4.0                                    | na                                  | 7.0 [3.0,5,9]                   | 3.1 [2.2,4.3]                | 7.9 (5.1)                          | 3.5 [2.5,5.6]                    | 2.2 [1.8,3.0]                                |
| α-fetoprotein (ng/ml) | >300, 51%                     | na                              | na                                     | na                                  | 113 [12,4051]                   | na                           | ≥100, 33%                          | 18 [7,182]                       | 38 [10,171]                                  |
| Data source           | GSE1898                       | a)                              | b)                                     | c)                                  | GSE364                          | d)                           | E-TABM-36                          | GSE9843                          | GSE10186                                     |
| Reference             | Nat Genet<br>36;1306 (2004)   | Mol Biol Cell<br>13;1929 (2002) | Lancet<br>361;923 (2003)               | Cancer Res<br>64;6058 (2004)        | Nat Med<br>9;416 (2003)         | Cancer Res<br>64;7263 (2004) | Hepatology<br>45;42 (2007)         | Cancer Res<br>68;6779 (2008)     | Cancer Res<br>69;7385 (2009)                 |

HCC: hepatocellular carcinoma, HBV: hepatitis B virus, HCV: hepatitis C virus, na: not available

<sup>\*</sup>: Liver Cancer Study Group of Japan, <sup>†</sup>: Barcelona Clinic Liver Cancer staging system,

<sup>‡</sup>: Edmondson-Steiner grade, <sup>§</sup>: UICC tumor differentiation (Well / Moderate / Poor),

Mean (SD, if available), Median [25%, 75%]

a) [http://smd.stanford.edu/cgi-bin/publication/viewPublication.pl?pub\\_no=107](http://smd.stanford.edu/cgi-bin/publication/viewPublication.pl?pub_no=107)

b) <http://surgery2.med.yamaguchi-u.ac.jp/research/DNAchip/hcc-recurrence/index.html>

c) <http://www.medizin.uni-koeln.de/kliniken/pathologie/supplementaldata.html>

d) <http://www2.genome.rcast.u-tokyo.ac.jp/HCC/>

**Table S3**

RT-qPCR primers.

| Gene                  | Forward               | Reverse               |
|-----------------------|-----------------------|-----------------------|
| KRT19                 | CGACTACAGCCACTACTA    | CAGACGGGCATTGTGCGATC  |
| EPCAM                 | ATAACCTGCTCTGAGCGAGTG | TGAAGTGCAGTCCGCAAACCT |
| GLUL                  | AAGTGTGTGGAAGAGTTGCC  | TGCTCACCATGTCCATTATC  |
| PRL13A (housekeeping) | GTACGCTGTGAAGGCATCAA  | GTTGGTGTTTCATCCGCTTG  |

**Table S4**

Liver cancer-related gene signatures in literature.

| Molecular signature           | Type of correlate                  | Reference                        |
|-------------------------------|------------------------------------|----------------------------------|
| Hoshida09_subclass            | Molecular feature (classification) | Cancer Res 69;7385 (2009)        |
| Boyault07_subclass            | Molecular feature (classification) | Hepatology 45;42 (2007)          |
| Lee04_subclass                | Molecular feature (classification) | Hepatology 40;667 (2004)         |
| Chiang08_subclass             | Molecular feature (classification) | Cancer Res 68;6779 (2008)        |
| Andersen10_KRT19              | Molecular feature                  | Hepatology 51;1401 (2010)        |
| Coulouarn08_TGFbeta           | Molecular feature                  | Hepatology 47;2059 (2008)        |
| KaposiNovak06_MET             | Molecular feature                  | J Clin Invest 116;1582 (2006)    |
| Villanueva11_KRT19            | Molecular feature                  | Gastroenterology 140;1501 (2011) |
| Yamashita08_EpCAM             | Molecular feature                  | Cancer Res 68;1451 (2008)        |
| Andersen12_cholangio_subclass | Biological phenotype               | Gastroenterology 142;1021 (2012) |
| Cairo08_hepatoblast_like      | Biological phenotype               | Cancer cell 14;471 (2008)        |
| Lee06_progenitor_cell         | Biological phenotype               | Nat Med 12;410 (2006)            |
| Oishi12_cholangio_stem_cell   | Biological phenotype               | Hepatology 56;1792 (2012)        |
| Woo10_cholangio_like          | Biological phenotype               | Cancer Res 70;3034 (2010)        |
| Yamashita09_cancer_stem_cell  | Biological phenotype               | Gastroenterology 136;1012 (2009) |
| Minguez11_vascular_invasion   | Clinical phenotype                 | J Hepatol 55;1325 (2011)         |
| Ye03_metastasis               | Clinical phenotype                 | Nat Med 9;416 (2003)             |
| Izuka03_early_recurrence      | Clinical outcome                   | Lancet 361;923 (2003)            |
| Kim12_survival                | Clinical outcome                   | Hepatology 55;1443 (2012)        |
| Kurokawa04_early_recurrence   | Clinical outcome                   | J Hepatol 41;284 (2004)          |
| Roessler10_metastasis         | Clinical outcome                   | Cancer Res 70;10202 (2010)       |
| Wang07_recurrence             | Clinical outcome                   | Clin Cancer Res 13;6275 (2007)   |
| Woo08_recurrence              | Clinical outcome                   | Clin Cancer Res 14;2056 (2008)   |

**Table S5**

Concordance of histopathological determination between evaluators.

|                                    | Training set<br>(96 HCC tumors) | Validation set<br>(99 HCC tumors) |
|------------------------------------|---------------------------------|-----------------------------------|
| Architectural pattern              |                                 |                                   |
| Microtrabicular                    | 73 (76%)                        | 81 (82%)                          |
| Macrotrabicular                    | 78 (81%)                        | 79 (80%)                          |
| Compact                            | 80 (83%)                        | 77 (78%)                          |
| Pseudoglandular                    | 74 (77%)                        | 79 (80%)                          |
| Cytological variant                |                                 |                                   |
| SH-HCC                             | 79 (82%)                        | 86 (87%)                          |
| Clear cell                         | 77 (80%)                        | 91 (92%)                          |
| Fatty change                       | 84 (88%)                        | 92 (93%)                          |
| Edmondson-Steiner grade I/II       | 79 (82%)                        | 79 (80%)                          |
| Osteoclastic cell                  | 92 (96%)                        | 96 (97%)                          |
| Immune cell infiltrate, score 0/1* | 74 (77%)                        | 72 (73%)                          |

\*Immune cell infiltrate score determined as 0: 0 to 5 cells, 1: 5 to 20 cells, 2: greater than 20 cells.

HCC: hepatocellular carcinoma, SH-HCC: steatohepatic HCC



**Table S6**

HCC molecular subclasses and tumor characteristics of SH-HCC and non-SH-HCC variants.

|                                           | Training and validation sets |                            |         | Training set          |                           |         | Validation set        |                           |         |
|-------------------------------------------|------------------------------|----------------------------|---------|-----------------------|---------------------------|---------|-----------------------|---------------------------|---------|
|                                           | SH-HCC<br>(36 tumors)        | Non-SH-HCC<br>(159 tumors) | P value | SH-HCC<br>(19 tumors) | Non-SH-HCC<br>(77 tumors) | P value | SH-HCC<br>(17 tumors) | Non-SH-HCC<br>(82 tumors) | P value |
| Molecular subclass, n (%)                 |                              |                            | <0.001  |                       |                           | 0.01    |                       |                           | 0.008   |
| S1                                        | 21 (58%)                     | 39 (25%)                   |         | 11 (58%)              | 19 (25%)                  |         | 10 (59%)              | 20 (24%)                  |         |
| S2/S3                                     | 15 (42%)                     | 120 (75%)                  |         | 8 (42%)               | 58 (75%)                  |         | 7 (41%)               | 62 (76%)                  |         |
| AFP (ng/mL), median (IQR)                 | 20 (6-92)                    | 24 (6-142)                 | 0.63    | 8 (5-62)              | 16 (4-75)                 | 0.92    | 26 (9-118)            | 43 (10-197)               | 0.63    |
| > 400 ng/mL                               | 3 (8.3%)                     | 20 (12.6%)                 | 0.58    | 1 (5%)                | 7 (9%)                    | 1.00    | 2 (12%)               | 13 (16%)                  | 1.00    |
| Tumor size (cm), median (IQR)             | 2.0 (1.8-3.0)                | 2.3 (2.0-3.0)              | 0.46    | 2.3 (2.0-3.1)         | 2.4 (2.0-2.9)             | 0.96    | 1.9 (1.7-2.9)         | 2.3 (1.8-3.0)             | 0.30    |
| Tumor number, n (%)                       |                              |                            |         |                       |                           |         |                       |                           |         |
| Single                                    | 32 (89%)                     | 123 (77%)                  | 0.92    | 18 (95%)              | 64 (83%)                  | 0.56    | 14 (82%)              | 59 (72%)                  | 0.84    |
| Multiple                                  | 4 (11%)                      | 24 (15%)                   |         | 1 (5%)                | 13 (17%)                  |         | 3 (18%)               | 11 (13%)                  |         |
| Edmondson-Steiner grade, n (%)            |                              |                            |         |                       |                           |         |                       |                           |         |
| I                                         | 4 (11%)                      | 29 (18%)                   | 0.17    | 1 (5%)                | 11 (14%)                  | 0.06    | 3 (18%)               | 18 (22%)                  | 0.80    |
| II                                        | 23 (64%)                     | 105 (66%)                  |         | 11 (58%)              | 55 (71%)                  |         | 12 (71%)              | 50 (61%)                  |         |
| III                                       | 8 (22%)                      | 25 (16%)                   |         | 6 (32%)               | 11 (14%)                  |         | 2 (12%)               | 14 (17%)                  |         |
| IV                                        | 1 (3%)                       | 0 (0%)                     |         | 1 (5%)                | 0 (0%)                    |         | 0 (0%)                | 0 (0%)                    |         |
| Steatosis in non-tumor liver*, n (%)      |                              |                            |         |                       |                           |         |                       |                           |         |
| Absent/minimal                            | 11 (31%)                     | 101 (64%)                  | 0.001   | 6 (32%)               | 46 (60%)                  | 0.01    | 5 (29%)               | 55 (67%)                  | 0.02    |
| Mild                                      | 16 (44%)                     | 41 (26%)                   |         | 8 (42%)               | 24 (31%)                  |         | 8 (47%)               | 17 (21%)                  |         |
| Moderate                                  | 6 (17%)                      | 14 (9%)                    |         | 3 (16%)               | 7 (9%)                    |         | 3 (18%)               | 7 (9%)                    |         |
| Severe                                    | 3 (8%)                       | 3 (2%)                     |         | 2 (11%)               | 0 (0%)                    |         | 1 (6%)                | 3 (4%)                    |         |
| Steatohepatitis in non-tumor liver, n (%) | 14 (39%)                     | 11 (7%)                    | <0.001  | 6 (32%)               | 5 (6%)                    | 0.007   | 8 (47%)               | 6 (7%)                    | <0.001  |

HCC: hepatocellular carcinoma, SH-HCC: steatohepatic HCC, AFP: alpha-fetoprotein.

\*Absent/minimal &lt;5%; Mild = 5%-33%; moderate = 34%-66%; severe &gt; 66%.

**Table S7**  
Gene sets associated with histopathological features in the validation set (Gene Set Enrichment Analysis).

| Histopathological features                                       | Gene set database                                                                            | Gene set                                           | NES                        | p-value                                                | FDR   |       |       |
|------------------------------------------------------------------|----------------------------------------------------------------------------------------------|----------------------------------------------------|----------------------------|--------------------------------------------------------|-------|-------|-------|
| Microtrabecular                                                  | <a href="#">Kyoto Encyclopedia of Genes and Genomes (KEGG)</a><br>(Curated pathway database) | KEGG_BUTANOATE_METABOLISM                          | 2.42                       | 0.000                                                  | 0.000 |       |       |
|                                                                  |                                                                                              | KEGG_TRYPTOPHAN_METABOLISM                         | 2.42                       | 0.000                                                  | 0.000 |       |       |
|                                                                  |                                                                                              | KEGG_TYROSINE_METABOLISM                           | 2.35                       | 0.000                                                  | 0.000 |       |       |
|                                                                  |                                                                                              | KEGG_FATTY_ACID_METABOLISM                         | 2.31                       | 0.000                                                  | 0.000 |       |       |
|                                                                  |                                                                                              | KEGG_VALINE_LEUCINE_AND_ISOLEUCINE_DEGRADATION     | 2.17                       | 0.000                                                  | 0.000 |       |       |
|                                                                  |                                                                                              | KEGG_LYSINE_DEGRADATION                            | 2.06                       | 0.000                                                  | 0.001 |       |       |
|                                                                  |                                                                                              | KEGG_PROPYANOATE_METABOLISM                        | 2.05                       | 0.000                                                  | 0.001 |       |       |
|                                                                  |                                                                                              | KEGG_STEROID_HORMONE_BIOSYNTHESIS                  | 2.00                       | 0.000                                                  | 0.001 |       |       |
|                                                                  |                                                                                              | KEGG_DRUG_METABOLISM_CYTOCHROME_P450               | 1.98                       | 0.000                                                  | 0.002 |       |       |
|                                                                  |                                                                                              | KEGG_METABOLISM_OF_XENOBIOTICS_BY_CYTOCHROME_P450  | 1.94                       | 0.000                                                  | 0.003 |       |       |
|                                                                  |                                                                                              | KEGG_RETINOL_METABOLISM                            | 1.92                       | 0.002                                                  | 0.003 |       |       |
|                                                                  |                                                                                              | KEGG_PYRUVATE_METABOLISM                           | 1.89                       | 0.000                                                  | 0.005 |       |       |
|                                                                  |                                                                                              | KEGG_RIG_I_LIKE_RECEPTOR_SIGNALING_PATHWAY         | 1.87                       | 0.002                                                  | 0.006 |       |       |
|                                                                  |                                                                                              | KEGG_GLYCINE_SERINE_AND_THREONINE_METABOLISM       | 1.86                       | 0.004                                                  | 0.006 |       |       |
|                                                                  |                                                                                              | KEGG_BETA_ALANINE_METABOLISM                       | 1.79                       | 0.005                                                  | 0.012 |       |       |
|                                                                  |                                                                                              | KEGG_HISTIDINE_METABOLISM                          | 1.78                       | 0.002                                                  | 0.013 |       |       |
|                                                                  |                                                                                              | KEGG_PHENYLALANINE_METABOLISM                      | 1.78                       | 0.009                                                  | 0.013 |       |       |
|                                                                  |                                                                                              | KEGG_GLYCOLYSIS_GLUUCONEOGENESIS                   | 1.78                       | 0.000                                                  | 0.013 |       |       |
|                                                                  |                                                                                              | KEGG_CITRATE_CYCLE_TCA_CYCLE                       | 1.77                       | 0.004                                                  | 0.012 |       |       |
|                                                                  |                                                                                              | KEGG_PPAR_SIGNALING_PATHWAY                        | 1.76                       | 0.005                                                  | 0.013 |       |       |
|                                                                  |                                                                                              | KEGG_GLYCEROLIPID_METABOLISM                       | 1.75                       | 0.007                                                  | 0.014 |       |       |
|                                                                  |                                                                                              | KEGG_ALLOGRAFT_REJECTION                           | 1.73                       | 0.005                                                  | 0.015 |       |       |
|                                                                  |                                                                                              | KEGG_PEROXISOME                                    | 1.73                       | 0.003                                                  | 0.015 |       |       |
|                                                                  |                                                                                              | KEGG_ABC_TRANSPORTERS                              | 1.68                       | 0.013                                                  | 0.021 |       |       |
|                                                                  |                                                                                              | KEGG_TYPE_I_DIABETES_MELLITUS                      | 1.65                       | 0.009                                                  | 0.029 |       |       |
|                                                                  |                                                                                              | KEGG_GRAFT_VERSUS_HOST_DISEASE                     | 1.64                       | 0.013                                                  | 0.030 |       |       |
|                                                                  |                                                                                              | KEGG_ADIPOCYTOKINE_SIGNALING_PATHWAY               | 1.62                       | 0.015                                                  | 0.035 |       |       |
|                                                                  |                                                                                              | KEGG_LINOLEIC_ACID_METABOLISM                      | 1.60                       | 0.024                                                  | 0.041 |       |       |
|                                                                  |                                                                                              | KEGG_JAK_STAT_SIGNALING_PATHWAY                    | 1.58                       | 0.003                                                  | 0.047 |       |       |
|                                                                  |                                                                                              | KEGG_AUTOIMMUNE_THYROID_DISEASE                    | 1.57                       | 0.010                                                  | 0.047 |       |       |
|                                                                  |                                                                                              | Reactome                                           | (Curated pathway database) | REACTOME_INTERFERON_ALPHA_BETA_SIGNALING               | 2.28  | 0.000 | 0.000 |
|                                                                  |                                                                                              |                                                    |                            | REACTOME_PHASE1_FUNCTIONALIZATION_OF_COMPOUNDS         | 2.07  | 0.000 | 0.005 |
|                                                                  |                                                                                              |                                                    |                            | REACTOME_TRANSPORT_OF_GLUUCOSE_AND_OTHER_SUGARS_BILE_S | 1.99  | 0.000 | 0.011 |
|                                                                  |                                                                                              |                                                    |                            | ALTS_AND_ORGANIC_ACIDS_METAL_IONS_AND_AMINE_COMPOUNDS  | 1.97  | 0.000 | 0.012 |
| REACTOME_BILE_ACID_AND_BILE_SALT_METABOLISM                      | 1.96                                                                                         |                                                    |                            | 0.000                                                  | 0.010 |       |       |
| REACTOME_BIOLOGICAL_OXIDATIONS                                   | 1.96                                                                                         |                                                    |                            | 0.000                                                  | 0.010 |       |       |
| REACTOME_CYTOCHROME_P450_ARRANGED_BY_SUBSTRATE_TYPE              | 1.96                                                                                         |                                                    |                            | 0.002                                                  | 0.008 |       |       |
| REACTOME_RIG_I_MDA5_MEDIATED_INDUCION_OF_IFN_ALPHA_BETA_PATHWAYS | 1.86                                                                                         | 0.002                                              | 0.024                      |                                                        |       |       |       |
| Gene Ontology                                                    | - Biological process                                                                         | NITROGEN_COMPOUND_CATABOLIC_PROCESS                | 2.00                       | 0.000                                                  | 0.030 |       |       |
|                                                                  |                                                                                              | AROMATIC_COMPOUND_METABOLIC_PROCESS                | 2.00                       | 0.002                                                  | 0.015 |       |       |
|                                                                  |                                                                                              | AMINE_CATABOLIC_PROCESS                            | 1.93                       | 0.000                                                  | 0.028 |       |       |
|                                                                  |                                                                                              | ORGANIC_ACID_METABOLIC_PROCESS                     | 1.89                       | 0.000                                                  | 0.036 |       |       |
| CARBOXYLIC_ACID_METABOLIC_PROCESS                                | 1.88                                                                                         | 0.000                                              | 0.037                      |                                                        |       |       |       |
| - Molecular function                                             | OXIDOREDUCTASE_ACTIVITY                                                                      | 2.35                                               | 0.000                      | 0.000                                                  |       |       |       |
|                                                                  | OXIDOREDUCTASE_ACTIVITY_ACTING_ON_THE_ALDEHYDE_OR_OXO_G                                      | 2.24                                               | 0.000                      | 0.000                                                  |       |       |       |
|                                                                  | ROUP_OF_DONORS                                                                               | 2.03                                               | 0.000                      | 0.005                                                  |       |       |       |
| ELECTRON_CARRIER_ACTIVITY                                        | 2.03                                                                                         | 0.000                                              | 0.005                      |                                                        |       |       |       |
| MONOOXYGENASE_ACTIVITY                                           | 1.95                                                                                         | 0.000                                              | 0.011                      |                                                        |       |       |       |
| - Cellular component                                             | MITOCHONDRION                                                                                | 2.07                                               | 0.000                      | 0.001                                                  |       |       |       |
| Chemical and genetic perturbations                               | (Experimentally defined target gene signature in literature)                                 | CHIANG_LIVER_CANCER_SUBCLASS_PROLIFERATION_DN      | 3.50                       | 0.000                                                  | 0.000 |       |       |
|                                                                  |                                                                                              | HOSHIDA_LIVER_CANCER_SUBCLASS_S3                   | 3.18                       | 0.000                                                  | 0.000 |       |       |
|                                                                  |                                                                                              | LEE_LIVER_CANCER_SURVIVAL_UP                       | 3.07                       | 0.000                                                  | 0.000 |       |       |
|                                                                  |                                                                                              | CHIANG_LIVER_CANCER_SUBCLASS_CTNNB1_UP             | 3.05                       | 0.000                                                  | 0.000 |       |       |
|                                                                  |                                                                                              | WOO_LIVER_CANCER_RECURRENCE_DN                     | 3.00                       | 0.000                                                  | 0.000 |       |       |
|                                                                  |                                                                                              | HSIAO_LIVER_SPECIFIC_GENES                         | 2.78                       | 0.000                                                  | 0.000 |       |       |
|                                                                  |                                                                                              | BOYALTY_LIVER_CANCER_SUBCLASS_G123_DN              | 2.76                       | 0.000                                                  | 0.000 |       |       |
|                                                                  |                                                                                              | CAIRO_HEPATOBLASTOMA_CLASSES_DN                    | 2.76                       | 0.000                                                  | 0.000 |       |       |
|                                                                  |                                                                                              | CAIRO_HEPATOBLASTOMA_DN                            | 2.66                       | 0.000                                                  | 0.000 |       |       |
|                                                                  |                                                                                              | BROWNE_INTERFERON_RESPONSIVE_GENES                 | 2.57                       | 0.000                                                  | 0.000 |       |       |
|                                                                  |                                                                                              | BOYALTY_LIVER_CANCER_SUBCLASS_G3_DN                | 2.52                       | 0.000                                                  | 0.000 |       |       |
|                                                                  |                                                                                              | OHGUCHI_LIVER_HNF4A_TARGETS_DN                     | 2.51                       | 0.000                                                  | 0.000 |       |       |
|                                                                  |                                                                                              | HOSHIDA_LIVER_CANCER_LATE_RECURRENCE_DN            | 2.48                       | 0.000                                                  | 0.000 |       |       |
|                                                                  |                                                                                              | DAUER_STAT3_TARGETS_DN                             | 2.45                       | 0.000                                                  | 0.000 |       |       |
|                                                                  |                                                                                              | MOSERLE_IFNA_RESPONSE                              | 2.45                       | 0.000                                                  | 0.000 |       |       |
|                                                                  |                                                                                              | FARMER_BREAST_CANCER_CLUSTER_1                     | 2.42                       | 0.000                                                  | 0.000 |       |       |
|                                                                  |                                                                                              | BOWIE_RESPONSE_TO_TAMOXIFEN                        | 2.41                       | 0.000                                                  | 0.000 |       |       |
|                                                                  |                                                                                              | BOWIE_RESPONSE_TO_EXTRACELLULAR_MATRIX             | 2.39                       | 0.000                                                  | 0.000 |       |       |
|                                                                  |                                                                                              | RADAEVA_RESPONSE_TO_IFNA1_UP                       | 2.32                       | 0.000                                                  | 0.000 |       |       |
|                                                                  |                                                                                              | BOSCO_INTERFERON_INDUCED_ANTIVIRAL_MODULE          | 2.31                       | 0.000                                                  | 0.000 |       |       |
|                                                                  |                                                                                              | SEITZ_NEOPLASTIC_TRANSFORMATION_BY_8P_DELETION_UP  | 2.29                       | 0.000                                                  | 0.000 |       |       |
|                                                                  |                                                                                              | HOSHIDA_LIVER_CANCER_SURVIVAL_DN                   | 2.28                       | 0.000                                                  | 0.000 |       |       |
|                                                                  |                                                                                              | UROSEVIC_RESPONSE_TO_IMIQUIMOD                     | 2.28                       | 0.000                                                  | 0.000 |       |       |
|                                                                  |                                                                                              | HECKER_IFNB1_TARGETS                               | 2.24                       | 0.000                                                  | 0.000 |       |       |
|                                                                  |                                                                                              | ZHU_CMV_8_HR_UP                                    | 2.20                       | 0.000                                                  | 0.000 |       |       |
|                                                                  |                                                                                              | ZHANG_INTERFERON_RESPONSE                          | 2.20                       | 0.000                                                  | 0.000 |       |       |
|                                                                  |                                                                                              | EINAV_INTERFERON_SIGNATURE_IN_CANCER               | 2.19                       | 0.000                                                  | 0.000 |       |       |
|                                                                  |                                                                                              | PIONTEK_PKD1_TARGETS_UP                            | 2.14                       | 0.000                                                  | 0.000 |       |       |
|                                                                  |                                                                                              | CHIANG_LIVER_CANCER_SUBCLASS_POLYSOMY7_UP          | 2.14                       | 0.000                                                  | 0.000 |       |       |
|                                                                  |                                                                                              | LEE_LIVER_CANCER_DENA_DN                           | 2.12                       | 0.000                                                  | 0.000 |       |       |
|                                                                  |                                                                                              | YAMASHITA_LIVER_CANCER_STEM_CELL_DN                | 2.12                       | 0.000                                                  | 0.001 |       |       |
|                                                                  |                                                                                              | IIZUKA_LIVER_CANCER_PROGRESSION_G2_G3_UP           | 2.12                       | 0.000                                                  | 0.001 |       |       |
|                                                                  |                                                                                              | SU_LIVER                                           | 2.11                       | 0.000                                                  | 0.001 |       |       |
|                                                                  |                                                                                              | LEE_LIVER_CANCER                                   | 2.09                       | 0.000                                                  | 0.001 |       |       |
|                                                                  |                                                                                              | TAKEDA_TARGETS_OF_NUP98_HOXA9_FUSION_8D_UP         | 2.09                       | 0.000                                                  | 0.001 |       |       |
|                                                                  |                                                                                              | LEE_LIVER_CANCER_CIPROFIBRATE_DN                   | 2.08                       | 0.000                                                  | 0.001 |       |       |
|                                                                  |                                                                                              | TAKEDA_TARGETS_OF_NUP98_HOXA9_FUSION_3D_UP         | 2.05                       | 0.000                                                  | 0.002 |       |       |
|                                                                  |                                                                                              | BENNETT_SYSTEMIC_LUPUS_ERYTHEMATOSUS               | 2.05                       | 0.000                                                  | 0.002 |       |       |
|                                                                  |                                                                                              | SANA_RESPONSE_TO_IFNG_UP                           | 2.04                       | 0.000                                                  | 0.002 |       |       |
|                                                                  |                                                                                              | BOYALTY_LIVER_CANCER_SUBCLASS_G6_UP                | 2.02                       | 0.000                                                  | 0.002 |       |       |
|                                                                  |                                                                                              | LEE_LIVER_CANCER_ACOX1_DN                          | 2.02                       | 0.000                                                  | 0.003 |       |       |
|                                                                  |                                                                                              | TAKEDA_TARGETS_OF_NUP98_HOXA9_FUSION_10D_UP        | 2.00                       | 0.000                                                  | 0.003 |       |       |
|                                                                  |                                                                                              | CAIRO_LIVER_DEVELOPMENT_DN                         | 2.00                       | 0.000                                                  | 0.003 |       |       |
|                                                                  |                                                                                              | KRASNOSELSKAYA_ILF3_TARGETS_UP                     | 2.00                       | 0.000                                                  | 0.003 |       |       |
|                                                                  |                                                                                              | MAHADEVAN_RESPONSE_TO_MP470_UP                     | 1.99                       | 0.002                                                  | 0.004 |       |       |
|                                                                  |                                                                                              | LEE_LIVER_CANCER_MYC_EZF1_DN                       | 1.95                       | 0.000                                                  | 0.005 |       |       |
|                                                                  |                                                                                              | GRAESSMANN_RESPONSE_TO_MC_AND_SERUM_DEPRIVATION_UP | 1.93                       | 0.000                                                  | 0.007 |       |       |
| COULOUARN_TEMPORAL_TGFB1_SIGNATURE_DN                            | 1.92                                                                                         | 0.000                                              | 0.008                      |                                                        |       |       |       |

|                                            |                                                                                              |                                                                                           |      |       |       |
|--------------------------------------------|----------------------------------------------------------------------------------------------|-------------------------------------------------------------------------------------------|------|-------|-------|
|                                            |                                                                                              | STAMBOLSKY_TARGETS_OF_MUTATED_TP53_DN                                                     | 1.92 | 0.000 | 0.008 |
|                                            |                                                                                              | LEE_LIVER_CANCER_E2F1_DN                                                                  | 1.91 | 0.000 | 0.008 |
| Liver cancer gene signatures in literature |                                                                                              | WOO10_CHOLANGIO_LIKE_DOWN                                                                 | 3.41 | 0.000 | 0.000 |
|                                            |                                                                                              | HOSHIDA09_SUBCLASS_S3                                                                     | 3.17 | 0.000 | 0.000 |
|                                            |                                                                                              | CHIANG08_SUBCLASS_CTNNB1                                                                  | 3.06 | 0.000 | 0.000 |
|                                            |                                                                                              | LEE04_SUBCLASS_B                                                                          | 3.05 | 0.000 | 0.000 |
|                                            |                                                                                              | WOO08_RECURRENCE_GOOD                                                                     | 2.99 | 0.000 | 0.000 |
|                                            |                                                                                              | VILLANUEVA11_KRT19_NEGATIVE                                                               | 2.47 | 0.000 | 0.000 |
|                                            |                                                                                              | ANDERSEN10_KRT19_NEGATIVE_CLSB                                                            | 2.46 | 0.000 | 0.000 |
|                                            |                                                                                              | KIM12_SURVIVAL_GOOD                                                                       | 2.42 | 0.000 | 0.000 |
|                                            |                                                                                              | CHIANG08_SUBCLASS_POLY7                                                                   | 2.14 | 0.000 | 0.000 |
|                                            |                                                                                              | YAMASHITA09_CANCER_STEM_CELL_DOWN                                                         | 2.10 | 0.000 | 0.000 |
|                                            |                                                                                              | BOYAULT07_SUBCLASS_G6                                                                     | 2.02 | 0.000 | 0.000 |
|                                            |                                                                                              | COULOUARN08_TGFB1_DOWN                                                                    | 1.95 | 0.000 | 0.001 |
|                                            |                                                                                              | CAIRO08_HEPATOBLAST_LIKE_GOOD_CLS1                                                        | 1.86 | 0.000 | 0.002 |
|                                            |                                                                                              | BOYAULT07_SUBCLASS_G5G6                                                                   | 1.70 | 0.004 | 0.008 |
|                                            |                                                                                              | MINGUEZ11_VASCULAR_INVASION_NEGATIVE                                                      | 1.65 | 0.008 | 0.012 |
|                                            |                                                                                              | KAPOSINOVAK06_MET_DOWN                                                                    | 1.64 | 0.013 | 0.012 |
|                                            |                                                                                              | YAMASHITA08_EPCAM_DOWN                                                                    | 1.58 | 0.034 | 0.022 |
|                                            |                                                                                              | WANG07_RECURRENCE_GOOD                                                                    | 1.56 | 0.042 | 0.026 |
| Macrotrabecular/compact                    | <a href="#">Kyoto Encyclopedia of Genes and Genomes (KEGG)</a><br>(Curated pathway database) | <a href="#">KEGG_DNA_REPLICATION</a>                                                      | 1.88 | 0.002 | 0.040 |
|                                            |                                                                                              | <a href="#">KEGG_SPLICEOSOME</a>                                                          | 1.82 | 0.003 | 0.040 |
|                                            |                                                                                              | <a href="#">KEGG_CELL_CYCLE</a>                                                           | 1.81 | 0.000 | 0.037 |
|                                            |                                                                                              | <a href="#">KEGG_VIBRIO_CHOLERAE_INFECTIO</a>                                             | 1.74 | 0.005 | 0.048 |
|                                            | <a href="#">Reactome</a><br>(Curated pathway database)                                       | <a href="#">REACTOME_CELL_CYCLE</a>                                                       | 2.40 | 0.000 | 0.000 |
|                                            |                                                                                              | <a href="#">REACTOME_CELL_CYCLE_MITOTIC</a>                                               | 2.39 | 0.000 | 0.000 |
|                                            |                                                                                              | <a href="#">REACTOME_MITOTIC_PROMETAPHASE</a>                                             | 2.26 | 0.000 | 0.000 |
|                                            |                                                                                              | <a href="#">REACTOME_MITOTIC_M_M_G1_PHASES</a>                                            | 2.24 | 0.000 | 0.001 |
|                                            |                                                                                              | <a href="#">REACTOME_MEIOTIC_RECOMBINATION</a>                                            | 2.22 | 0.000 | 0.001 |
|                                            |                                                                                              | <a href="#">REACTOME_CLEAVAGE_OF_GROWING_TRANSCRIPT_IN_THE_TERMINATION_REGION</a>         | 2.22 | 0.000 | 0.001 |
|                                            |                                                                                              | <a href="#">REACTOME_RNA_POL_I_PROMOTER_OPENING</a>                                       | 2.20 | 0.000 | 0.001 |
|                                            |                                                                                              | <a href="#">REACTOME_DNA_REPLICATION</a>                                                  | 2.19 | 0.000 | 0.001 |
|                                            |                                                                                              | <a href="#">REACTOME_DEPOSITION_OF_NEW_CENPA_CONTAINING_NUCLEOSOMES_AT_THE_CENTROMERE</a> | 2.16 | 0.000 | 0.001 |
|                                            |                                                                                              | <a href="#">REACTOME_CHROMOSOME_MAINTENANCE</a>                                           | 2.11 | 0.000 | 0.002 |
|                                            |                                                                                              | <a href="#">REACTOME_MEIOSIS</a>                                                          | 2.11 | 0.000 | 0.002 |
|                                            |                                                                                              | <a href="#">REACTOME_RNA_POL_I_TRANSCRIPTION</a>                                          | 2.10 | 0.000 | 0.002 |
|                                            |                                                                                              | <a href="#">REACTOME_GLYCOSPHINGOLIPID_METABOLISM</a>                                     | 2.07 | 0.000 | 0.003 |
|                                            |                                                                                              | <a href="#">REACTOME_METABOLISM_OF_NUCLEOTIDES</a>                                        | 2.01 | 0.003 | 0.005 |
|                                            |                                                                                              | <a href="#">REACTOME_RECRUITMENT_OF_MITOTIC_CENTROSOME_PROTEINS_AND_COMPLEXES</a>         | 2.00 | 0.000 | 0.005 |
|                                            |                                                                                              | <a href="#">REACTOME_PROTEIN_FOLDING</a>                                                  | 1.99 | 0.000 | 0.006 |
|                                            |                                                                                              | <a href="#">REACTOME_TRANS_GOLGI_NETWORK_VESICLE_BUDDING</a>                              | 1.97 | 0.000 | 0.006 |
|                                            |                                                                                              | <a href="#">REACTOME_PREFOLDIN_MEDIATED_TRANSFER_OF_SUBSTRATE_TO_CCT_TRIC</a>             | 1.97 | 0.002 | 0.006 |
|                                            |                                                                                              | <a href="#">REACTOME_MEIOTIC_SYNOPSIS</a>                                                 | 1.95 | 0.000 | 0.007 |
|                                            |                                                                                              | <a href="#">REACTOME_S_PHASE</a>                                                          | 1.95 | 0.000 | 0.006 |
|                                            |                                                                                              | <a href="#">REACTOME_G2_M_CHECKPOINTS</a>                                                 | 1.95 | 0.000 | 0.006 |
|                                            |                                                                                              | <a href="#">REACTOME_MITOTIC_G2_G2_M_PHASES</a>                                           | 1.95 | 0.000 | 0.006 |
|                                            |                                                                                              | <a href="#">REACTOME_PACKAGING_OF_TELOMERE_ENDS</a>                                       | 1.94 | 0.005 | 0.006 |
|                                            |                                                                                              | <a href="#">REACTOME_TRANSCRIPTION</a>                                                    | 1.93 | 0.000 | 0.007 |
|                                            |                                                                                              | <a href="#">REACTOME_MEMBRANE_TRAFFICKING</a>                                             | 1.90 | 0.000 | 0.009 |
|                                            |                                                                                              | <a href="#">REACTOME_TELOMERE_MAINTENANCE</a>                                             | 1.90 | 0.000 | 0.009 |
|                                            |                                                                                              | <a href="#">REACTOME_ACTIVATION_OF_ATR_IN_RESPONSE_TO_REPLICATION_STRESS</a>              | 1.90 | 0.005 | 0.009 |
|                                            |                                                                                              | <a href="#">REACTOME_METABOLISM_OF_RNA</a>                                                | 1.88 | 0.000 | 0.010 |
|                                            |                                                                                              | <a href="#">REACTOME_MITOTIC_G1_G1_S_PHASES</a>                                           | 1.88 | 0.000 | 0.009 |
|                                            |                                                                                              | <a href="#">REACTOME_G0_AND_EARLY_G1</a>                                                  | 1.88 | 0.000 | 0.009 |
|                                            |                                                                                              | <a href="#">REACTOME_LOSS_OF_NLP_FROM_MITOTIC_CENTROSOMES</a>                             | 1.87 | 0.005 | 0.010 |
|                                            |                                                                                              | <a href="#">REACTOME_SPHINGOLIPID_METABOLISM</a>                                          | 1.87 | 0.000 | 0.009 |
|                                            |                                                                                              | <a href="#">REACTOME_G1_S_TRANSITION</a>                                                  | 1.87 | 0.000 | 0.010 |
|                                            |                                                                                              | <a href="#">REACTOME_RNA_POL_I_RNA_POL_III_AND_MITOCHONDRIAL_TRANSCRIPTION</a>            | 1.84 | 0.003 | 0.013 |
|                                            |                                                                                              | <a href="#">REACTOME_E2F_MEDIATED_REGULATION_OF_DNA_REPLICATION</a>                       | 1.84 | 0.000 | 0.013 |
|                                            |                                                                                              | <a href="#">REACTOME_APOPTOTIC_EXECUTION_PHASE</a>                                        | 1.82 | 0.003 | 0.015 |
|                                            |                                                                                              | <a href="#">REACTOME_METABOLISM_OF_NON_CODING_RNA</a>                                     | 1.81 | 0.005 | 0.016 |
|                                            |                                                                                              | <a href="#">REACTOME_HIV_LIFE_CYCLE</a>                                                   | 1.79 | 0.000 | 0.019 |
|                                            |                                                                                              | <a href="#">REACTOME_SIGNALING_BY_NOTCH1</a>                                              | 1.79 | 0.000 | 0.019 |
|                                            |                                                                                              | <a href="#">REACTOME_CELL_CYCLE_CHECKPOINTS</a>                                           | 1.79 | 0.003 | 0.018 |
|                                            |                                                                                              | <a href="#">REACTOME_DOUBLE_STRAND_BREAK_REPAIR</a>                                       | 1.78 | 0.007 | 0.020 |
|                                            |                                                                                              | <a href="#">REACTOME_RNA_POL_II_TRANSCRIPTION</a>                                         | 1.75 | 0.003 | 0.024 |
|                                            |                                                                                              | <a href="#">REACTOME_DNA_STRAND_ELONGATION</a>                                            | 1.75 | 0.005 | 0.024 |
|                                            |                                                                                              | <a href="#">REACTOME_ASSEMBLY_OF_THE_PRE_REPLICATIVE_COMPLEX</a>                          | 1.74 | 0.000 | 0.024 |
|                                            |                                                                                              | <a href="#">REACTOME_PROCESSING_OF_CAPPED_INTRON_CONTAINING_PRE_MRNA</a>                  | 1.74 | 0.000 | 0.024 |
|                                            |                                                                                              | <a href="#">REACTOME_LATE_PHASE_OF_HIV_LIFE_CYCLE</a>                                     | 1.74 | 0.003 | 0.024 |
|                                            |                                                                                              | <a href="#">REACTOME_GOLGI_ASSOCIATED_VESICLE_BIOGENESIS</a>                              | 1.73 | 0.008 | 0.025 |
|                                            |                                                                                              | <a href="#">REACTOME_APOPTOTIC_CLEAVAGE_OF_CELLULAR_PROTEINS</a>                          | 1.73 | 0.007 | 0.025 |
|                                            |                                                                                              | <a href="#">REACTOME_AMYLOIDS</a>                                                         | 1.73 | 0.003 | 0.025 |
|                                            |                                                                                              | <a href="#">REACTOME_APC_C_CDC20_MEDIATED_DEGRADATION_OF_MITOTIC_PROTEINS</a>             | 1.73 | 0.003 | 0.024 |
| Gene Ontology                              |                                                                                              |                                                                                           |      |       |       |
| - Biological process                       |                                                                                              | <a href="#">CHROMOSOME_SEGREGATION</a>                                                    | 2.38 | 0.000 | 0.001 |
|                                            |                                                                                              | <a href="#">RNA_PROCESSING</a>                                                            | 2.35 | 0.000 | 0.001 |
|                                            |                                                                                              | <a href="#">MICROTUBULE_CYTOSKELETON_ORGANIZATION_AND_BIOGENESIS</a>                      | 2.30 | 0.000 | 0.000 |
|                                            |                                                                                              | <a href="#">RNA_SPLICING</a>                                                              | 2.17 | 0.000 | 0.003 |
|                                            |                                                                                              | <a href="#">MICROTUBULE_BASED_PROCESS</a>                                                 | 2.11 | 0.000 | 0.005 |
|                                            |                                                                                              | <a href="#">M_PHASE_OF_MITOTIC_CELL_CYCLE</a>                                             | 2.10 | 0.000 | 0.004 |
|                                            |                                                                                              | <a href="#">CHROMOSOME_ORGANIZATION_AND_BIOGENESIS</a>                                    | 2.10 | 0.000 | 0.004 |
|                                            |                                                                                              | <a href="#">MITOSIS</a>                                                                   | 2.10 | 0.000 | 0.003 |
|                                            |                                                                                              | <a href="#">MITOTIC_CELL_CYCLE</a>                                                        | 2.09 | 0.000 | 0.003 |
|                                            |                                                                                              | <a href="#">M_PHASE</a>                                                                   | 2.06 | 0.000 | 0.004 |
|                                            |                                                                                              | <a href="#">CELL_CYCLE_PROCESS</a>                                                        | 2.04 | 0.000 | 0.004 |
|                                            |                                                                                              | <a href="#">CELL_CYCLE_PHASE</a>                                                          | 1.92 | 0.000 | 0.015 |
|                                            |                                                                                              | <a href="#">CELL_CYCLE_GO_0007049</a>                                                     | 1.88 | 0.000 | 0.022 |
|                                            |                                                                                              | <a href="#">CELL_CYCLE_CHECKPOINT_GO_0000075</a>                                          | 1.83 | 0.008 | 0.033 |
| - Cellular component                       |                                                                                              | <a href="#">CENTROSOME</a>                                                                | 2.18 | 0.000 | 0.000 |
|                                            |                                                                                              | <a href="#">CHROMOSOMEPERICENTRIC_REGION</a>                                              | 2.13 | 0.000 | 0.002 |
|                                            |                                                                                              | <a href="#">SPINDLE</a>                                                                   | 2.11 | 0.000 | 0.002 |
|                                            |                                                                                              | <a href="#">MICROTUBULE_ORGANIZING_CENTER</a>                                             | 2.09 | 0.000 | 0.004 |
|                                            |                                                                                              | <a href="#">KINETOCHORE</a>                                                               | 2.05 | 0.000 | 0.004 |
|                                            |                                                                                              | <a href="#">CHROMOSOMAL_PART</a>                                                          | 2.01 | 0.000 | 0.005 |
|                                            |                                                                                              | <a href="#">RIBONUCLEOPROTEIN_COMPLEX</a>                                                 | 1.99 | 0.000 | 0.006 |

|                                                                                                    |                                                     |      |       |       |
|----------------------------------------------------------------------------------------------------|-----------------------------------------------------|------|-------|-------|
|                                                                                                    | CHROMOSOME                                          | 1.95 | 0.000 | 0.008 |
|                                                                                                    | MICROTUBULE_CYTOSKELETON                            | 1.94 | 0.000 | 0.008 |
|                                                                                                    | NUCLEAR_PART                                        | 1.87 | 0.000 | 0.016 |
|                                                                                                    | RUFFLE                                              | 1.85 | 0.005 | 0.017 |
|                                                                                                    | MICROTUBULE                                         | 1.85 | 0.007 | 0.017 |
|                                                                                                    | SPLICEOSOME                                         | 1.82 | 0.005 | 0.018 |
|                                                                                                    | INTRACELLULAR_NON_MEMBRANE_BOUND_ORGANELLE          | 1.78 | 0.000 | 0.024 |
|                                                                                                    | CONDENSED_CHROMOSOME                                | 1.78 | 0.009 | 0.023 |
|                                                                                                    | NON_MEMBRANE_BOUND_ORGANELLE                        | 1.77 | 0.000 | 0.023 |
|                                                                                                    | ER_GOLGI_INTERMEDIATE_COMPARTMENT                   | 1.75 | 0.014 | 0.026 |
|                                                                                                    | CYTOSKELETAL_PART                                   | 1.74 | 0.000 | 0.025 |
|                                                                                                    | GOLGI_APPARATUS_PART                                | 1.67 | 0.008 | 0.039 |
|                                                                                                    | PERINUCLEAR_REGION_OF_CYTOPLASM                     | 1.67 | 0.010 | 0.037 |
| Oncogenic pathway targets                                                                          | CORDENONSI_YAP_CONSERVED_SIGNATURE                  | 1.92 | 0.000 | 0.009 |
|                                                                                                    | VEGF_A_UP.V1_DN                                     | 1.84 | 0.000 | 0.014 |
|                                                                                                    | RB_P107_DN.V1_UP                                    | 1.80 | 0.000 | 0.014 |
| Chemical and genetic perturbations<br>(Experimentally defined target gene signature in literature) | CAIRO_HEPATOBLASTOMA_CLASSES_UP                     | 3.48 | 0.000 | 0.000 |
|                                                                                                    | CROONQUIST_NRAS_SIGNALING_DN                        | 3.19 | 0.000 | 0.000 |
|                                                                                                    | CHIANG_LIVER_CANCER_SUBCLASS_PROLIFERATION_UP       | 3.18 | 0.000 | 0.000 |
|                                                                                                    | WINNEPENNINGCKX_MELANOMA_METASTASIS_UP              | 3.13 | 0.000 | 0.000 |
|                                                                                                    | ROSTY_CERVICAL_CANCER_PROLIFERATION_CLUSTER         | 3.12 | 0.000 | 0.000 |
|                                                                                                    | PATIL_LIVER_CANCER                                  | 3.07 | 0.000 | 0.000 |
|                                                                                                    | CROONQUIST_IL6_DEPRIVATION_DN                       | 3.06 | 0.000 | 0.000 |
|                                                                                                    | BENPORATH_PROLIFERATION                             | 3.03 | 0.000 | 0.000 |
|                                                                                                    | SOTIRIOU_BREAST_CANCER_GRADE_1_VS_3_UP              | 3.03 | 0.000 | 0.000 |
|                                                                                                    | RODRIGUES_THYROID_CARINOMA_POORLY_DIFFERENTIATED_UP | 2.99 | 0.000 | 0.000 |
|                                                                                                    | LEE_LIVER_CANCER_SURVIVAL_DN                        | 2.96 | 0.000 | 0.000 |
|                                                                                                    | LI_WILMS_TUMOR_VS_FETAL_KIDNEY_1_DN                 | 2.93 | 0.000 | 0.000 |
|                                                                                                    | RHODES_UNDIFFERENTIATED_CANCER                      | 2.91 | 0.000 | 0.000 |
|                                                                                                    | BOYAULT_LIVER_CANCER_SUBCLASS_G123_UP               | 2.91 | 0.000 | 0.000 |
|                                                                                                    | WHITEFORD_PEDIATRIC_CANCER_MARKERS                  | 2.91 | 0.000 | 0.000 |
|                                                                                                    | ZHOU_CELL_CYCLE_GENES_IN_IR_RESPONSE_24HR           | 2.90 | 0.000 | 0.000 |
|                                                                                                    | BIDUS_METASTASIS_UP                                 | 2.90 | 0.000 | 0.000 |
|                                                                                                    | CHANG_CYCLING_GENES                                 | 2.89 | 0.000 | 0.000 |
|                                                                                                    | KOBAYASHI_EGFR_SIGNALING_24HR_DN                    | 2.89 | 0.000 | 0.000 |
|                                                                                                    | HOSHIDA_LIVER_CANCER_SUBCLASS_S2                    | 2.87 | 0.000 | 0.000 |
|                                                                                                    | BORCZUK_MALIGNANT_MESOTHELIOMA_UP                   | 2.87 | 0.000 | 0.000 |
|                                                                                                    | BOYAULT_LIVER_CANCER_SUBCLASS_G3_UP                 | 2.84 | 0.000 | 0.000 |
|                                                                                                    | SHEDDEN_LUNG_CANCER_POOR_SURVIVAL_A6                | 2.82 | 0.000 | 0.000 |
|                                                                                                    | MITSIADES_RESPONSE_TO_APLIDIN_DN                    | 2.81 | 0.000 | 0.000 |
|                                                                                                    | GRAHAM_NORMAL QUIESCENT_VS_NORMAL_DIVIDING_DN       | 2.80 | 0.000 | 0.000 |
|                                                                                                    | MISSIAGLIA_REGULATED_BY_METHYLATION_DN              | 2.80 | 0.000 | 0.000 |
|                                                                                                    | BURTON_ADIPOGENESIS_3                               | 2.77 | 0.000 | 0.000 |
|                                                                                                    | KANG_DOXORUBICIN_RESISTANCE_UP                      | 2.75 | 0.000 | 0.000 |
|                                                                                                    | KONG_E2F3_TARGETS                                   | 2.75 | 0.000 | 0.000 |
|                                                                                                    | ZHAN_MULTIPLE_MYELOMA_PR_UP                         | 2.74 | 0.000 | 0.000 |
|                                                                                                    | DUTERTRE ESTRADIOL_RESPONSE_24HR_UP                 | 2.73 | 0.000 | 0.000 |
|                                                                                                    | PUJANA_BRCA2_PCC_NETWORK                            | 2.71 | 0.000 | 0.000 |
|                                                                                                    | WHITFIELD_CELL_CYCLE_LITERATURE                     | 2.68 | 0.000 | 0.000 |
|                                                                                                    | KAUFFMANN_MELANOMA_RELAPSE_UP                       | 2.66 | 0.000 | 0.000 |
|                                                                                                    | PUJANA_BRCA_CENTERED_NETWORK                        | 2.64 | 0.000 | 0.000 |
|                                                                                                    | YU_MYC_TARGETS_UP                                   | 2.63 | 0.000 | 0.000 |
|                                                                                                    | ZHOU_CELL_CYCLE_GENES_IN_IR_RESPONSE_6HR            | 2.61 | 0.000 | 0.000 |
|                                                                                                    | SARRIO_EPITHELIAL_MESENCHYMAL_TRANSITION_UP         | 2.60 | 0.000 | 0.000 |
|                                                                                                    | MORI_IMMATURE_B_LYMPHOCYTE_DN                       | 2.60 | 0.000 | 0.000 |
|                                                                                                    | FEVR_CTNNB1_TARGETS_DN                              | 2.59 | 0.000 | 0.000 |
|                                                                                                    | KAMMINGA_EZH2_TARGETS                               | 2.59 | 0.000 | 0.000 |
|                                                                                                    | BLUM_RESPONSE_TO_SALIRASIB_DN                       | 2.58 | 0.000 | 0.000 |
|                                                                                                    | FOURNIER_ACINAR_DEVELOPMENT_LATE_2                  | 2.57 | 0.000 | 0.000 |
|                                                                                                    | HORIUCHI_WTAP_TARGETS_DN                            | 2.57 | 0.000 | 0.000 |
|                                                                                                    | JOHNSTONE_PARVB_TARGETS_3_DN                        | 2.57 | 0.000 | 0.000 |
|                                                                                                    | FERREIRA_EWINGS_SARCOMA_UNSTABLE_VS_STABLE_UP       | 2.56 | 0.000 | 0.000 |
|                                                                                                    | WONG_EMBRYONIC_STEM_CELL_CORE                       | 2.56 | 0.000 | 0.000 |
|                                                                                                    | MARTINEZ_RESPONSE_TO TRABECTEDIN_DN                 | 2.56 | 0.000 | 0.000 |
|                                                                                                    | MORI_LARGE_PRE_BIL_LYMPHOCYTE_UP                    | 2.55 | 0.000 | 0.000 |
|                                                                                                    | BURTON_ADIPOGENESIS_PEAK_AT_24HR                    | 2.55 | 0.000 | 0.000 |
| Transcription factor targets                                                                       | KRCTCNNNMANAGC_UNKNOWN                              | 2.17 | 0.000 | 0.005 |
|                                                                                                    | SGCGSSAAA_V\$E2F1DP2_01                             | 2.13 | 0.000 | 0.003 |
|                                                                                                    | V\$E2F1_Q6                                          | 2.09 | 0.000 | 0.003 |
|                                                                                                    | GGCENNMSMYNTTG_UNKNOWN                              | 2.01 | 0.000 | 0.007 |
|                                                                                                    | GKCGCNNNNNTGAYG_UNKNOWN                             | 1.92 | 0.000 | 0.013 |
|                                                                                                    | RRCCGTTA_UNKNOWN                                    | 1.87 | 0.003 | 0.018 |
|                                                                                                    | V\$E2F4DP1_01                                       | 1.86 | 0.000 | 0.019 |
|                                                                                                    | V\$E2F_Q4_01                                        | 1.82 | 0.000 | 0.026 |
|                                                                                                    | V\$E2F1_Q4_01                                       | 1.78 | 0.000 | 0.032 |
|                                                                                                    | V\$E2F_Q4                                           | 1.77 | 0.000 | 0.030 |
|                                                                                                    | V\$E2F1_Q6_01                                       | 1.77 | 0.000 | 0.028 |
|                                                                                                    | GCCATNTTG_V\$YY1_Q6                                 | 1.77 | 0.000 | 0.027 |
|                                                                                                    | V\$E2F_Q2                                           | 1.76 | 0.000 | 0.026 |
|                                                                                                    | V\$E2F_Q6                                           | 1.76 | 0.000 | 0.024 |
|                                                                                                    | V\$E2F1_Q3                                          | 1.76 | 0.000 | 0.023 |
|                                                                                                    | V\$E2F_Q3                                           | 1.75 | 0.000 | 0.023 |
|                                                                                                    | V\$E2F1_Q4                                          | 1.75 | 0.000 | 0.022 |
|                                                                                                    | V\$E2F4DP2_01                                       | 1.73 | 0.000 | 0.026 |
|                                                                                                    | V\$E2F1DP1_01                                       | 1.73 | 0.000 | 0.025 |
|                                                                                                    | V\$E2F_Q3_01                                        | 1.72 | 0.000 | 0.025 |
|                                                                                                    | V\$E2F1DP2_01                                       | 1.72 | 0.000 | 0.024 |
|                                                                                                    | V\$DR4_Q2                                           | 1.69 | 0.003 | 0.031 |
|                                                                                                    | V\$E2F1DP1RB_01                                     | 1.67 | 0.006 | 0.035 |
|                                                                                                    | V\$NFAT_Q6                                          | 1.64 | 0.003 | 0.044 |
|                                                                                                    | ATCMNTCCGY_UNKNOWN                                  | 1.63 | 0.018 | 0.044 |
|                                                                                                    | V\$NFMUE1_Q6                                        | 1.63 | 0.003 | 0.044 |
| Liver cancer gene signatures in literature                                                         | CHIANG08_SUBCLASS_PROLIFERATION                     | 3.19 | 0.000 | 0.000 |
|                                                                                                    | LEE04_SUBCLASS_A                                    | 3.02 | 0.000 | 0.000 |
|                                                                                                    | BOYAULT07_SUBCLASS_G1G2G3                           | 2.96 | 0.000 | 0.000 |
|                                                                                                    | HOSHIDA09_SUBCLASS_S2                               | 2.84 | 0.000 | 0.000 |
|                                                                                                    | BOYAULT07_SUBCLASS_G3                               | 2.84 | 0.000 | 0.000 |
|                                                                                                    | VILLANUEVA11_KRT19_POSITIVE                         | 2.82 | 0.000 | 0.000 |
|                                                                                                    | WOO10_CHOLANGIO_LIKE_UP                             | 2.60 | 0.000 | 0.000 |
|                                                                                                    | BOYAULT07_SUBCLASS_G2G3                             | 2.37 | 0.000 | 0.000 |
|                                                                                                    | KIM12_SURVIVAL_POOR                                 | 2.27 | 0.000 | 0.000 |
|                                                                                                    | BOYAULT07_SUBCLASS_G1G2                             | 2.23 | 0.000 | 0.000 |
|                                                                                                    | ANDERSEN10_KRT19_POSITIVE_CLSA                      | 2.21 | 0.000 | 0.000 |
|                                                                                                    | BOYAULT07_SUBCLASS_G1                               | 2.19 | 0.000 | 0.000 |
|                                                                                                    | MINGUEZ11_VASCULAR_INVASION_POSITIVE                | 2.14 | 0.000 | 0.000 |

|                 |                                                                                                    |                                                                                                                                                                                                                                                                                                                                                                                                                                                                                                                                                                                                                                                                                                                                                                                                                                                                                                                                                                                                                                                                                                                                                                                                                                                                                                                                                                                                                                                                                                                                                                                                                                                                                                                                                                                                                                                                                                                                                                                                                                                                                                                                                                                                                                                                                                                                                                                                                                                                                                                                                                                                                                                                                  |                                                                                                                                                                                                                                                                                                                                                                                                              |                                                                                                                                                                                                                                                                                                                                                                                                                                                                                                                                        |                                                                                                                                                       |       |
|-----------------|----------------------------------------------------------------------------------------------------|----------------------------------------------------------------------------------------------------------------------------------------------------------------------------------------------------------------------------------------------------------------------------------------------------------------------------------------------------------------------------------------------------------------------------------------------------------------------------------------------------------------------------------------------------------------------------------------------------------------------------------------------------------------------------------------------------------------------------------------------------------------------------------------------------------------------------------------------------------------------------------------------------------------------------------------------------------------------------------------------------------------------------------------------------------------------------------------------------------------------------------------------------------------------------------------------------------------------------------------------------------------------------------------------------------------------------------------------------------------------------------------------------------------------------------------------------------------------------------------------------------------------------------------------------------------------------------------------------------------------------------------------------------------------------------------------------------------------------------------------------------------------------------------------------------------------------------------------------------------------------------------------------------------------------------------------------------------------------------------------------------------------------------------------------------------------------------------------------------------------------------------------------------------------------------------------------------------------------------------------------------------------------------------------------------------------------------------------------------------------------------------------------------------------------------------------------------------------------------------------------------------------------------------------------------------------------------------------------------------------------------------------------------------------------------|--------------------------------------------------------------------------------------------------------------------------------------------------------------------------------------------------------------------------------------------------------------------------------------------------------------------------------------------------------------------------------------------------------------|----------------------------------------------------------------------------------------------------------------------------------------------------------------------------------------------------------------------------------------------------------------------------------------------------------------------------------------------------------------------------------------------------------------------------------------------------------------------------------------------------------------------------------------|-------------------------------------------------------------------------------------------------------------------------------------------------------|-------|
|                 |                                                                                                    | YAMASHITA08_EPCAM_UP                                                                                                                                                                                                                                                                                                                                                                                                                                                                                                                                                                                                                                                                                                                                                                                                                                                                                                                                                                                                                                                                                                                                                                                                                                                                                                                                                                                                                                                                                                                                                                                                                                                                                                                                                                                                                                                                                                                                                                                                                                                                                                                                                                                                                                                                                                                                                                                                                                                                                                                                                                                                                                                             | 2.12                                                                                                                                                                                                                                                                                                                                                                                                         | 0.000                                                                                                                                                                                                                                                                                                                                                                                                                                                                                                                                  | 0.000                                                                                                                                                 |       |
|                 |                                                                                                    | WOO08_RECURRENCE_POOR                                                                                                                                                                                                                                                                                                                                                                                                                                                                                                                                                                                                                                                                                                                                                                                                                                                                                                                                                                                                                                                                                                                                                                                                                                                                                                                                                                                                                                                                                                                                                                                                                                                                                                                                                                                                                                                                                                                                                                                                                                                                                                                                                                                                                                                                                                                                                                                                                                                                                                                                                                                                                                                            | 2.04                                                                                                                                                                                                                                                                                                                                                                                                         | 0.000                                                                                                                                                                                                                                                                                                                                                                                                                                                                                                                                  | 0.000                                                                                                                                                 |       |
|                 |                                                                                                    | CAIRO08_HEPATOBLAST_LIKE_POOR_CLS2                                                                                                                                                                                                                                                                                                                                                                                                                                                                                                                                                                                                                                                                                                                                                                                                                                                                                                                                                                                                                                                                                                                                                                                                                                                                                                                                                                                                                                                                                                                                                                                                                                                                                                                                                                                                                                                                                                                                                                                                                                                                                                                                                                                                                                                                                                                                                                                                                                                                                                                                                                                                                                               | 1.87                                                                                                                                                                                                                                                                                                                                                                                                         | 0.000                                                                                                                                                                                                                                                                                                                                                                                                                                                                                                                                  | 0.002                                                                                                                                                 |       |
|                 |                                                                                                    | KAPOSINOVA06_MET_UP                                                                                                                                                                                                                                                                                                                                                                                                                                                                                                                                                                                                                                                                                                                                                                                                                                                                                                                                                                                                                                                                                                                                                                                                                                                                                                                                                                                                                                                                                                                                                                                                                                                                                                                                                                                                                                                                                                                                                                                                                                                                                                                                                                                                                                                                                                                                                                                                                                                                                                                                                                                                                                                              | 1.78                                                                                                                                                                                                                                                                                                                                                                                                         | 0.005                                                                                                                                                                                                                                                                                                                                                                                                                                                                                                                                  | 0.006                                                                                                                                                 |       |
|                 |                                                                                                    | HOSHIDA09_SUBCLASS_S1                                                                                                                                                                                                                                                                                                                                                                                                                                                                                                                                                                                                                                                                                                                                                                                                                                                                                                                                                                                                                                                                                                                                                                                                                                                                                                                                                                                                                                                                                                                                                                                                                                                                                                                                                                                                                                                                                                                                                                                                                                                                                                                                                                                                                                                                                                                                                                                                                                                                                                                                                                                                                                                            | 1.76                                                                                                                                                                                                                                                                                                                                                                                                         | 0.000                                                                                                                                                                                                                                                                                                                                                                                                                                                                                                                                  | 0.007                                                                                                                                                 |       |
|                 |                                                                                                    | COULOUARN08_TGFB1_UP                                                                                                                                                                                                                                                                                                                                                                                                                                                                                                                                                                                                                                                                                                                                                                                                                                                                                                                                                                                                                                                                                                                                                                                                                                                                                                                                                                                                                                                                                                                                                                                                                                                                                                                                                                                                                                                                                                                                                                                                                                                                                                                                                                                                                                                                                                                                                                                                                                                                                                                                                                                                                                                             | 1.64                                                                                                                                                                                                                                                                                                                                                                                                         | 0.006                                                                                                                                                                                                                                                                                                                                                                                                                                                                                                                                  | 0.017                                                                                                                                                 |       |
| Pseudoglandular | <a href="#">Biocarta</a><br>(Curated pathway database)                                             | <a href="#">BIOCARTA_CHEMICAL_PATHWAY</a>                                                                                                                                                                                                                                                                                                                                                                                                                                                                                                                                                                                                                                                                                                                                                                                                                                                                                                                                                                                                                                                                                                                                                                                                                                                                                                                                                                                                                                                                                                                                                                                                                                                                                                                                                                                                                                                                                                                                                                                                                                                                                                                                                                                                                                                                                                                                                                                                                                                                                                                                                                                                                                        | 2.00                                                                                                                                                                                                                                                                                                                                                                                                         | 0.000                                                                                                                                                                                                                                                                                                                                                                                                                                                                                                                                  | 0.028                                                                                                                                                 |       |
|                 | Chemical and genetic perturbations<br>(Experimentally defined target gene signature in literature) | <a href="#">CHIANG_LIVER_CANCER_SUBCLASS_CTNNB1_UP</a>                                                                                                                                                                                                                                                                                                                                                                                                                                                                                                                                                                                                                                                                                                                                                                                                                                                                                                                                                                                                                                                                                                                                                                                                                                                                                                                                                                                                                                                                                                                                                                                                                                                                                                                                                                                                                                                                                                                                                                                                                                                                                                                                                                                                                                                                                                                                                                                                                                                                                                                                                                                                                           | 2.60                                                                                                                                                                                                                                                                                                                                                                                                         | 0.000                                                                                                                                                                                                                                                                                                                                                                                                                                                                                                                                  | 0.000                                                                                                                                                 |       |
|                 | Liver cancer gene signatures in literature                                                         | <a href="#">CHIANG_CTNNB1_UP</a><br><a href="#">BOYAULT_G6_UP</a>                                                                                                                                                                                                                                                                                                                                                                                                                                                                                                                                                                                                                                                                                                                                                                                                                                                                                                                                                                                                                                                                                                                                                                                                                                                                                                                                                                                                                                                                                                                                                                                                                                                                                                                                                                                                                                                                                                                                                                                                                                                                                                                                                                                                                                                                                                                                                                                                                                                                                                                                                                                                                | 2.55<br>1.82                                                                                                                                                                                                                                                                                                                                                                                                 | 0.000<br>0.000                                                                                                                                                                                                                                                                                                                                                                                                                                                                                                                         | 0.000<br>0.022                                                                                                                                        |       |
| SH-HCC          | <a href="#">Reactome</a><br>(Curated pathway database)                                             | <a href="#">REACTOME_COLLAGEN_FORMATION</a><br><a href="#">REACTOME_EXTRACELLULAR_MATRIX_ORGANIZATION</a>                                                                                                                                                                                                                                                                                                                                                                                                                                                                                                                                                                                                                                                                                                                                                                                                                                                                                                                                                                                                                                                                                                                                                                                                                                                                                                                                                                                                                                                                                                                                                                                                                                                                                                                                                                                                                                                                                                                                                                                                                                                                                                                                                                                                                                                                                                                                                                                                                                                                                                                                                                        | 2.16<br>2.14                                                                                                                                                                                                                                                                                                                                                                                                 | 0.000<br>0.000                                                                                                                                                                                                                                                                                                                                                                                                                                                                                                                         | 0.009<br>0.005                                                                                                                                        |       |
|                 | Gene Ontology<br>- Cellular component                                                              | <a href="#">COLLAGEN</a><br><a href="#">EXTRACELLULAR_MATRIX_PART</a><br><a href="#">EXTRACELLULAR_MATRIX</a><br><a href="#">PROTEINACEOUS_EXTRACELLULAR_MATRIX</a>                                                                                                                                                                                                                                                                                                                                                                                                                                                                                                                                                                                                                                                                                                                                                                                                                                                                                                                                                                                                                                                                                                                                                                                                                                                                                                                                                                                                                                                                                                                                                                                                                                                                                                                                                                                                                                                                                                                                                                                                                                                                                                                                                                                                                                                                                                                                                                                                                                                                                                              | 2.04<br>1.96<br>1.96<br>1.95                                                                                                                                                                                                                                                                                                                                                                                 | 0.000<br>0.000<br>0.000<br>0.000                                                                                                                                                                                                                                                                                                                                                                                                                                                                                                       | 0.018<br>0.021<br>0.015<br>0.012                                                                                                                      |       |
|                 | Oncogenic pathway targets                                                                          | <a href="#">CAHOY_ASTROGLIAL</a><br><a href="#">ESC_V6.5_UP_EARLY.V1_DN</a><br><a href="#">MEL18_DN.V1_UP</a><br><a href="#">BMI1_DN_MEL18_DN.V1_UP</a><br><a href="#">RPS14_DN.V1_UP</a><br><a href="#">BMI1_DN.V1_UP</a><br><a href="#">CORDENONSI_YAP_CONSERVED_SIGNATURE</a><br><a href="#">BCAT_BILD_ET_AL_UP</a><br><a href="#">STK33_SKM_UP</a><br><a href="#">RB_DN.V1_DN</a><br><a href="#">RB_P107_DN.V1_UP</a><br><a href="#">HOXA9_DN.V1_UP</a><br><a href="#">STK33_UP</a><br><a href="#">SIRNA_EIF4GI_DN</a><br><a href="#">STK33_NOMO_UP</a><br><a href="#">KRAS.DF.V1_UP</a><br><a href="#">RAF_UP.V1_UP</a>                                                                                                                                                                                                                                                                                                                                                                                                                                                                                                                                                                                                                                                                                                                                                                                                                                                                                                                                                                                                                                                                                                                                                                                                                                                                                                                                                                                                                                                                                                                                                                                                                                                                                                                                                                                                                                                                                                                                                                                                                                                     | 2.41<br>2.34<br>2.20<br>2.14<br>2.10<br>2.00<br>1.82<br>1.79<br>1.72<br>1.70<br>1.70<br>1.68<br>1.62<br>1.60<br>1.58<br>1.58<br>1.55                                                                                                                                                                                                                                                                         | 0.000<br>0.000<br>0.000<br>0.000<br>0.000<br>0.000<br>0.003<br>0.006<br>0.000<br>0.000<br>0.000<br>0.000<br>0.000<br>0.007<br>0.000<br>0.005<br>0.005                                                                                                                                                                                                                                                                                                                                                                                  | 0.000<br>0.000<br>0.001<br>0.000<br>0.001<br>0.001<br>0.010<br>0.011<br>0.016<br>0.019<br>0.017<br>0.017<br>0.028<br>0.031<br>0.033<br>0.032<br>0.040 |       |
|                 | Chemical and genetic perturbations<br>(Experimentally defined target gene signature in literature) | <a href="#">WOO_LIVER_CANCER_RECURRENCE_UP</a><br><a href="#">HOSHIDA_LIVER_CANCER_SUBCLASS_S1</a><br><a href="#">TURASHVILI_BREAST_LOBULAR_CARCINOMA_VS_LOBULAR_NORMAL_DN</a><br><a href="#">ANASTASSIOU_CANCER_MESENCHYMAL_TRANSITION_SIGNATURE</a><br><a href="#">CHIANG_LIVER_CANCER_SUBCLASS_CTNNB1_DN</a><br><a href="#">TURASHVILI_BREAST_LOBULAR_CARCINOMA_VS_DUCTAL_NORMAL_UP</a><br><a href="#">HOSHIDA_LIVER_CANCER_SURVIVAL_UP</a><br><a href="#">SCHUETZ_BREAST_CANCER_DUCTAL_INVASIVE_UP</a><br><a href="#">CHARAFE_BREAST_CANCER_LUMINAL_VS_MESENCHYMAL_DN</a><br><a href="#">BURTON_ADIPOGENESIS_8</a><br><a href="#">KIM_GLIS2_TARGETS_UP</a><br><a href="#">IGLESIAS_E2F_TARGETS_UP</a><br><a href="#">BOYAULT_LIVER_CANCER_SUBCLASS_G5_DN</a><br><a href="#">CROONQUIST_STROMAL_STIMULATION_UP</a><br><a href="#">LINDGREN_BLABDER_CANCER_CLUSTER_2B</a><br><a href="#">CERVERA_SDHB_TARGETS_1_UP</a><br><a href="#">RODWELL_AGING_KIDNEY_NO_BLOOD_UP</a><br><a href="#">KHETCHOUMIAN_TRIM24_TARGETS_UP</a><br><a href="#">CLASPER_LYMPHATIC_VESSELS_DURING_METASTASIS_DN</a><br><a href="#">VECCHI_GASTRIC_CANCER_ADVANCED_VS_EARLY_UP</a><br><a href="#">RODWELL_AGING_KIDNEY_UP</a><br><a href="#">BOQUEST_STEM_CELL_UP</a><br><a href="#">MCLACHLAN_DENTAL_CARIES_UP</a><br><a href="#">PETRETTO_CARDIAC_HYPERTROPHY</a><br><a href="#">PICCALUGA_ANGIOIMMUNOBLASTIC_LYMPHOMA_UP</a><br><a href="#">PASINI_SUZ12_TARGETS_DN</a><br><a href="#">CHICAS_RB1_TARGETS_CONFLUENT</a><br><a href="#">VERHAAK_GLIOBLASTOMA_NEURAL</a><br><a href="#">JEON_SMAD6_TARGETS_UP</a><br><a href="#">KEEN_RESPONSE_TO_ROSIGLITAZONE_DN</a><br><a href="#">MIKKELSEN_MEF_LCP_WITH_H3K4ME3</a><br><a href="#">BASSO_CD40_SIGNALING_UP</a><br><a href="#">TURASHVILI_BREAST_DUCTAL_CARCINOMA_VS_DUCTAL_NORMAL_UP</a><br><a href="#">MCLACHLAN_DENTAL_CARIES_DN</a><br><a href="#">NADLER_OBESITY_UP</a><br><a href="#">REN_ALVEOLAR_RHABDOMYOSARCOMA_DN</a><br><a href="#">GERHOLD_ADIPOGENESIS_DN</a><br><a href="#">LIU_SMARCA4_TARGETS</a><br><a href="#">LINDSTEDT_DENDRITIC_CELL_MATURATION_D</a><br><a href="#">GU_PDEF_TARGETS_UP</a><br><a href="#">NAKAMURA_ADIPOGENESIS_LATE_DN</a><br><a href="#">HELLEBREKERS_SILENCED_DURING_TUMOR_ANGIOGENESIS</a><br><a href="#">PETROVA_ENDOTHELIUM_LYMPHATIC_VS_BLOOD_DN</a><br><a href="#">NAKAMURA_ADIPOGENESIS_EARLY_DN</a><br><a href="#">LIM_MAMMARY_LUMINAL_MATURE_DN</a><br><a href="#">STEGER_ADIPOGENESIS_DN</a><br><a href="#">WIELAND_UP_BY_HBV_INFECTION</a><br><a href="#">ONDER_CDH1_SIGNALING_VIA_CTNNB1</a><br><a href="#">PARK_APL_PATHOGENESIS_DN</a><br><a href="#">FARMER_BREAST_CANCER_CLUSTER_5</a> | 3.20<br>3.18<br>2.82<br>2.82<br>2.79<br>2.71<br>2.65<br>2.62<br>2.55<br>2.53<br>2.52<br>2.50<br>2.47<br>2.47<br>2.44<br>2.43<br>2.40<br>2.40<br>2.37<br>2.36<br>2.33<br>2.31<br>2.31<br>2.31<br>2.28<br>2.28<br>2.26<br>2.25<br>2.24<br>2.23<br>2.22<br>2.22<br>2.22<br>2.21<br>2.21<br>2.20<br>2.20<br>2.20<br>2.18<br>2.17<br>2.15<br>2.15<br>2.15<br>2.14<br>2.13<br>2.12<br>2.11<br>2.10<br>2.09<br>2.09 | 0.000<br>0.000<br>0.000<br>0.000<br>0.000<br>0.000<br>0.000<br>0.000<br>0.000<br>0.000<br>0.000<br>0.000<br>0.000<br>0.000<br>0.000<br>0.000<br>0.000<br>0.000<br>0.000<br>0.000<br>0.000<br>0.000<br>0.000<br>0.000<br>0.000<br>0.000<br>0.000<br>0.000<br>0.000<br>0.000<br>0.000<br>0.000<br>0.000<br>0.000<br>0.000<br>0.000<br>0.000<br>0.000<br>0.000<br>0.000<br>0.000<br>0.000<br>0.000<br>0.000<br>0.000<br>0.000<br>0.003<br>0.002<br>0.002<br>0.002<br>0.002<br>0.002<br>0.002<br>0.002<br>0.002<br>0.003<br>0.003<br>0.003 |                                                                                                                                                       |       |
|                 | microRNA targets                                                                                   | <a href="#">CCCNNNNNAAGWT_UNKOWN</a>                                                                                                                                                                                                                                                                                                                                                                                                                                                                                                                                                                                                                                                                                                                                                                                                                                                                                                                                                                                                                                                                                                                                                                                                                                                                                                                                                                                                                                                                                                                                                                                                                                                                                                                                                                                                                                                                                                                                                                                                                                                                                                                                                                                                                                                                                                                                                                                                                                                                                                                                                                                                                                             | 1.95                                                                                                                                                                                                                                                                                                                                                                                                         | 0.000                                                                                                                                                                                                                                                                                                                                                                                                                                                                                                                                  | 0.033                                                                                                                                                 |       |
|                 | Liver cancer gene signatures in literature                                                         | <a href="#">WOO08_RECURRENCE_UP</a><br><a href="#">HOSHIDA09_SUBCLASS_S1</a><br><a href="#">WOO10_CHOLANGIO_LIKE_UP</a><br><a href="#">KIM12_SURVIVAL_POOR</a><br><a href="#">OISHI12_CHOLANGIO_STEM_CELL_DOWN</a><br><a href="#">CHIANG08_SUBCLASS_PROLIFERATION</a>                                                                                                                                                                                                                                                                                                                                                                                                                                                                                                                                                                                                                                                                                                                                                                                                                                                                                                                                                                                                                                                                                                                                                                                                                                                                                                                                                                                                                                                                                                                                                                                                                                                                                                                                                                                                                                                                                                                                                                                                                                                                                                                                                                                                                                                                                                                                                                                                            | 3.20<br>3.13<br>2.65<br>2.48<br>1.90<br>1.77                                                                                                                                                                                                                                                                                                                                                                 | 0.000<br>0.000<br>0.000<br>0.000<br>0.000<br>0.000                                                                                                                                                                                                                                                                                                                                                                                                                                                                                     | 0.000<br>0.000<br>0.000<br>0.000<br>0.003<br>0.012                                                                                                    |       |
|                 | Clear cell                                                                                         | <a href="#">Kyoto Encyclopedia of Genes and Genomes (KEGG)</a><br>(Curated pathway database)                                                                                                                                                                                                                                                                                                                                                                                                                                                                                                                                                                                                                                                                                                                                                                                                                                                                                                                                                                                                                                                                                                                                                                                                                                                                                                                                                                                                                                                                                                                                                                                                                                                                                                                                                                                                                                                                                                                                                                                                                                                                                                                                                                                                                                                                                                                                                                                                                                                                                                                                                                                     | <a href="#">KEGG_MISMATCH_REPAIR</a>                                                                                                                                                                                                                                                                                                                                                                         | 1.96                                                                                                                                                                                                                                                                                                                                                                                                                                                                                                                                   | 0.000                                                                                                                                                 | 0.046 |
|                 |                                                                                                    | Chemical and genetic perturbations                                                                                                                                                                                                                                                                                                                                                                                                                                                                                                                                                                                                                                                                                                                                                                                                                                                                                                                                                                                                                                                                                                                                                                                                                                                                                                                                                                                                                                                                                                                                                                                                                                                                                                                                                                                                                                                                                                                                                                                                                                                                                                                                                                                                                                                                                                                                                                                                                                                                                                                                                                                                                                               | <a href="#">HOSHIDA_LIVER_CANCER_SUBCLASS_S2</a>                                                                                                                                                                                                                                                                                                                                                             | 2.82                                                                                                                                                                                                                                                                                                                                                                                                                                                                                                                                   | 0.000                                                                                                                                                 | 0.000 |

|                                                              |                                                        |      |       |       |
|--------------------------------------------------------------|--------------------------------------------------------|------|-------|-------|
| (Experimentally defined target gene signature in literature) | <a href="#">BOYAUULT LIVER CANCER SUBCLASS G123_UP</a> | 2.39 | 0.000 | 0.001 |
|                                                              | SHEN_SMARCA2_TARGETS_UP                                | 2.24 | 0.000 | 0.007 |
|                                                              | BIDUS_METASTASIS_UP                                    | 2.24 | 0.000 | 0.006 |
|                                                              | PUJANA_XPRSS_INT_NETWORK                               | 2.13 | 0.000 | 0.020 |
|                                                              | LY_AGING_MIDDLE_DN                                     | 2.12 | 0.000 | 0.018 |
|                                                              | YAMASHITA_LIVER_CANCER_WITH_EPCAM_UP                   | 2.12 | 0.000 | 0.017 |
|                                                              | KAUFFMANN_MELANOMA_RELAPSE_UP                          | 2.11 | 0.000 | 0.015 |
|                                                              | ZHOU_CELL_CYCLE_GENES_IN_IR_RESPONSE_24HR              | 2.10 | 0.000 | 0.016 |
|                                                              | SONG_TARGETS_OF_IE86_CMV_PROTEIN                       | 2.10 | 0.000 | 0.015 |
|                                                              | KAMMINGA_EZH2_TARGETS                                  | 2.07 | 0.000 | 0.018 |
|                                                              | CHANG_CYCLING_GENES                                    | 2.02 | 0.000 | 0.032 |
|                                                              | PATIL_LIVER_CANCER                                     | 2.00 | 0.000 | 0.036 |
|                                                              | ISHIDA_E2F_TARGETS                                     | 1.97 | 0.000 | 0.040 |
|                                                              | BOYAUULT_LIVER_CANCER_SUBCLASS_G1_UP                   | 1.97 | 0.000 | 0.038 |
|                                                              | WINNEPENNINGCK_MELANOMA_METASTASIS_UP                  | 1.97 | 0.000 | 0.036 |
|                                                              | CHOI_ATL_STAGE_PREDICTOR                               | 1.96 | 0.000 | 0.036 |
|                                                              | GABRIELY_MIR21_TARGETS                                 | 1.96 | 0.000 | 0.036 |
|                                                              | ZHOU_CELL_CYCLE_GENES_IN_IR_RESPONSE_6HR               | 1.95 | 0.000 | 0.036 |
|                                                              | PUJANA_BRCA2_PCC_NETWORK                               | 1.95 | 0.000 | 0.034 |
|                                                              | MITSIANES_RESPONSE_TO_APLIDIN_DN                       | 1.93 | 0.000 | 0.037 |
|                                                              | WHITFIELD_CELL_CYCLE_LITERATURE                        | 1.90 | 0.006 | 0.046 |
|                                                              | PUJANA_BRCA_CENTERED_NETWORK                           | 1.89 | 0.000 | 0.049 |
|                                                              | CROONQUIST_IL6_DEPRIVATION_DN                          | 1.89 | 0.000 | 0.047 |
|                                                              | GRAHAM_NORMAL QUIESCENT_VS_NORMAL_DIVIDING_DN          | 1.88 | 0.000 | 0.046 |
|                                                              | FUJII_YBX1_TARGETS_DN                                  | 1.88 | 0.000 | 0.045 |
|                                                              | MISSIAGLIA_REGULATED_BY_METHYLATION_DN                 | 1.88 | 0.000 | 0.045 |
|                                                              | MORI_IMMATURE_B_LYMPHOCYTE_DN                          | 1.88 | 0.000 | 0.044 |
|                                                              | CAIRO_HEPATOBLASTOMA_CLASSES_UP                        | 1.87 | 0.000 | 0.046 |
|                                                              | MILI_PSEUDOPODIA_HAPTOTAXIS_UP                         | 1.86 | 0.000 | 0.045 |
| microRNA targets                                             | ATAACCT,MIR-154                                        | 2.21 | 0.000 | 0.004 |
| Liver cancer gene signatures in literature                   | HOSHIDA09_SUBCLASS_S2                                  | 2.79 | 0.000 | 0.000 |
|                                                              | BOYAUULT07_SUBCLASS_G1G2G3                             | 2.39 | 0.000 | 0.000 |
|                                                              | YAMASHITA08_EPCAM_UP                                   | 2.20 | 0.000 | 0.001 |
|                                                              | BOYAUULT07_SUBCLASS_G1G2                               | 1.97 | 0.004 | 0.005 |
|                                                              | BOYAUULT07_SUBCLASS_G1                                 | 1.96 | 0.000 | 0.004 |
|                                                              | LEE04_SUBCLASS_A                                       | 1.76 | 0.000 | 0.026 |
|                                                              | VILLANUEVA11_KRT19_POSITIVE                            | 1.70 | 0.000 | 0.030 |
|                                                              | OISHI12_CHOLANGIO_STEM_CELL_UP                         | 1.70 | 0.000 | 0.026 |
|                                                              | ANDERSEN10_KRT19_POSITIVE_CLSA                         | 1.63 | 0.036 | 0.043 |

Gene sets with FDR <0.05 or top 50 gene sets are shown.

NES: normalized enrichment score, FDR: false discovery rate, SH-HCC: Steatohepatitic-hepatocellular carcinoma. Click each gene set name for detailed information. p-value/FDR of "0.000" indicates <0.001.

**Table S8**

Key driver genes in gene regulatory network modules (Planar Filtered Network Analysis, Key Driver Analysis).

| Module          | Size (no. genes) | Key driver genes                                                                                                                                                                                                                                                                                                                                                                                                                                                                                                                                                                                                                                                                                                                                                                                                                                                                                                                                                                                                                                                                                                                                                                                                                                                                                                                                                      |
|-----------------|------------------|-----------------------------------------------------------------------------------------------------------------------------------------------------------------------------------------------------------------------------------------------------------------------------------------------------------------------------------------------------------------------------------------------------------------------------------------------------------------------------------------------------------------------------------------------------------------------------------------------------------------------------------------------------------------------------------------------------------------------------------------------------------------------------------------------------------------------------------------------------------------------------------------------------------------------------------------------------------------------------------------------------------------------------------------------------------------------------------------------------------------------------------------------------------------------------------------------------------------------------------------------------------------------------------------------------------------------------------------------------------------------|
| PFN-module_no1  | 1436             | LCN1, SEC11A, RPL13, ST13, SF3A1, SURF1, IFNA5, RPS3A, CTBP1, DMBT1, CLIC4, SMS, PPP2CB, CA6, I<br>LF3, DHCR24, HIP2, STX4, MAP2K5, THBS2, MOXD1, VIL2, CEACAM8, RQCD1, COL6A3, SDC2, MMP19, C<br>OPS8, RGS10, GALNT10, FRG1, PDAP1, TFAP2C, RAD23B, TNFRSF8, PRAF2, NDUFB1, RAB2A, ATP6V1<br>C1, HNRPA2B1, IER3, ARL2BP, BPGM, DAG1, PHF21A, SMARCD2, ABCF3, C21orf91, PMM2, PPP3CA, HL<br>A-<br>F, PPP2R5C, SAT1, ATP1B1, CSTF2, SNAPC5, TRIM14, AES, DDX3Y, SDC4, BCAT2, PPARD, PSMD6, ADR<br>M1, RPS6KB2, NIPSNAP1, AKR1B1, MAPKAPK3, CREB1, EIF2S1, PLK2, TRIM26, TSN, DNAJA1, PC, PIK4<br>CB, APP, FN1, RPS6KB1, ANXA7, TRAK2, HNRPC, SLC22A18, EPAS1, CITED2, EIF3S10, PPIH, CD151, PA<br>RK7, GUK1, LSM3, PRKACA, SERPINA1, REL, TMEM97, BMI1, GIPC1, SSR4, DDX17, NGFRAP1, CD46, HL<br>A-<br>DQB1, TCTA, UBXD6, USP34, XRCC5, CLTB, FOXA1, PAFAH1B2, PCBP2, SRRM2, ZEB1, CNIH, LAMB2, PT<br>TG1, TJP1, MRPL12, PENK, RARRES1, RPL36AL, C4BPB, LUM, APOB, GNB1, SAFB2, POLR2J, CRK, PCK2<br>, CYB5A, FCGR1A, MGST2, PGK1, NPC2, ECHS1, HADHB, GTF2A1, PPIB, ZNF423, ATP5O, COPS2, ELK1,<br>PSEN1, UCK2, PSCD1, COL3A1, HOXB5, IFRD2, PIB5PA, TAF11, ZNF3, LY96, RAC2, TUBG1, ACAT1, FABP<br>4, MRPS31, RYK, UCN, ZNF22, DDX1, NAPA, PAPSS2, SLC9A3R1, SREBF2, WWP1, TOP2A, EVI2B, PTPR<br>C, COL1A2, COL1A1, ECM2, SNRPB2, ANP32B, REEP5, CXCL12, KNG1, TNIP1 |
| PFN-module_no10 | 166              | FOXF2, GHRH, MMP8, PRR5, NOX4, MC4R, AMELX, ANGPTL4, SPINK2, SRPK3, SLC2A3, TGFB2, TCF15,<br>CHRNA2, SPRR3, CSDC2, LCT, ART3, KIR3DL2, MYOG, RPL11, SEMA4D, PLAUR                                                                                                                                                                                                                                                                                                                                                                                                                                                                                                                                                                                                                                                                                                                                                                                                                                                                                                                                                                                                                                                                                                                                                                                                     |
| PFN-module_no11 | 214              | ARHGDI, ATP2A3, CD3E, LTB, CD52, EVI2B, IGJ, BTG2, PTPRC, AIF1, IL16, SH2D2A, LCP1, CD27, LAPTM<br>5, GMFG, SPOCK2, C6orf32, CD3D, ARHGAP25, LCP2, CD48, PRKCB1, STK17B, GFSM3, FGL2, CXCR4, P<br>SCDBP, LSP1, MS4A6A, TMSB10                                                                                                                                                                                                                                                                                                                                                                                                                                                                                                                                                                                                                                                                                                                                                                                                                                                                                                                                                                                                                                                                                                                                         |
| PFN-module_no13 | 266              | ACOX2, ADH1B, SEC14L2, MTHFD1, HSD11B1, DCXR, AQP9, CPB2, ALDH6A1, HPD, APOC4, CDO1, ADH<br>6, DBT, PKM2, SERPINC1, RGN, NR1I3, SCP2, PCK2, PAH, GCDH, FLJ20699, SLC10A1, PON3, TAT, C6, FA<br>AH, PPARA, C4BPA, CAT                                                                                                                                                                                                                                                                                                                                                                                                                                                                                                                                                                                                                                                                                                                                                                                                                                                                                                                                                                                                                                                                                                                                                  |
| PFN-module_no14 | 139              | TCEAL4, YY1, DYNLL1, HINT1, ACTN1, SDCBP, ZC3H15, PSME1, SRP19, EIF4B, SNRPC, RAB4A, CAV1, EI<br>F3S2, REST, UVRAG, MBP, SF3B2, AP2S1, SUB1, REEP5, ATP5G3, RAP1B, RPS6KA3                                                                                                                                                                                                                                                                                                                                                                                                                                                                                                                                                                                                                                                                                                                                                                                                                                                                                                                                                                                                                                                                                                                                                                                            |
| PFN-module_no15 | 87               | TOP2A, NCAPH, DLG7, PRC1, TTK, LMNB1, SMC4, UBE2C, NEK2, NUSAP1, HIST1H2AE, KIAA0101, PTTG<br>1, CCNA2, GINS1, MCM6, ZWINT, BRCA1, CDK2, RRM2, HIST1H2BD, ACAA1, C22orf5                                                                                                                                                                                                                                                                                                                                                                                                                                                                                                                                                                                                                                                                                                                                                                                                                                                                                                                                                                                                                                                                                                                                                                                              |
| PFN-module_no18 | 577              | LBX1, IFNA1, SOX11, LALBA, BMPR1B, CACNG1, LRP2, MYT1, GPR3, EPYC, FABP7, STAR, CYP2A7, DRD<br>5, WNT1, NEUROD2, PSG6, NEUROG1, CSRP3, OR2H1, PRM1, COX7A1, PPM1E, SCD5, CSF3, GABRB1,<br>CHRN2, MCF2, NDP, ACRV1, CLUL1, CRISP1, KIF2C, BMP4, MPL, CD1A, KRT81, ATP12A, MOG, AMPH, B<br>RAF, PTK2, CEP350, NUAK1, CUL4B, RIT2, BLK, CYP24A1, KRT76, NPPA, PYY, DNNT, KRT75, MAGEA9, C<br>CL1, CDH8, CST1, HTR6, SUMO1, ZP2, MYOC, SCG2, VIP, ADORA2B, DLG3, HOXA1, KLK6, KRT13, LEFTY<br>2, ATP1A2, DLX2, HTR2A, NHLH2, SLC2A5, CCR5, GPR143, GYPE, OPRM1, DUSP2, TBR1, CRYBB1                                                                                                                                                                                                                                                                                                                                                                                                                                                                                                                                                                                                                                                                                                                                                                                       |
| PFN-module_no2  | 859              | ST13, SURF1, SEC11A, CTBP1, SMS, PPP2CB, HIP2, SF3A1, RQCD1, RPL13, FRG1, PDAP1, RAD23B, ND<br>UFB1, CSTF2, AES, LCN1, AKR1B1, EIF2S1, IFNA5, HNRPC, PPIH, PARK7, GUK1, HNRPA2B1, LSM3, PRK<br>ACA, TMEM97, RPL36AL, SSR4, NGFRAP1, CD46, HLA-<br>DQB1, CLTB, CNIH, PTTG1, C4BPB, APOB, GNB1, POLR2J, REL, VIL2, PCK2, CYB5A, FCGR1A, MGST2, N<br>PC2, ECHS1, HADHB, SAFB2, SERPINA1, PPIB, COPS2, PSEN1, UCK2, IFRD2, BRE, PLS3, BRD8, LY96, PS<br>MA7, RAC2, TUBG1, ACAT1, CRK, FABP4, MRPS31, RYK, STX4, UCN, ZNF22, DDX1, NUP155, NAPA, PAPS<br>S2, SLC9A3R1, SREBF2, WWP1, BRP44, COL18A1, TOP2A, CHPF, EVI2B, PTPRC, SMAD5, SRI, GNG10, H<br>AX1, PDK2, PTPRM, SIPA1, TBCB, LAMB2, LSM1, PSMA3, TIMM17A, UQCRFS1, USP1, IDI1, ITPR2, CENP<br>B, FBL, ITGA6, MGST3, CCT5, HOXC4, UBD, ANP32B, DHX9, REEP5, COPE, ELAVL1, SHC1, FAM3C, RAB5<br>A, KNG1, AGXT                                                                                                                                                                                                                                                                                                                                                                                                                                                                                                      |
| PFN-module_no20 | 961              | DIRAS1, SH3GL3, MYCBP, AOC2, CNR1, TNNI3, BAPX1, APOBEC1, GABRQ, PCSK1, CKS2, TNRC4, ADA<br>RB1, BRCA2, CD6, UNC5C, TLE2, EPHA5, KLK4, ERAF, F2RL1, GIPR, GATA1, IL3, VTN, SSPN, XK, MYLK2, P<br>APPA, PNLP, ERCC4, HIST1H4B, CUL4A, CBX3, RHOA, CALD1, SPRY2, TNFRSF14, QPRT, CPA1, RXRG,<br>NOL14, SFTPB, SLC25A6, WT1, IFNGR2, RNF2, ANGPT2, REGL, CNTN1, FOXI1, CLPS, SYT17, TCFL5, CS<br>F3R, SFRS1, SMARCC1, GP9, PFDN5, REV3L, ZFP161, ADNP, LMNB2, MALL, INPP5E, CDKN2B, CHST2, S<br>YNCRIP, TAZ, ZIC1, ATP2A1, GPRC5B, PTHR1, MDC1, MYBPC1, POU1F1, RB1CC1, TP73, Septin<br>4, CTNNA1, NELL1, MYOM2, SLC15A2, DTYMK, HNRPU, RNPEP, SULF1, EXDL2, NAV3, NMT1, NPR1, TFA<br>P2A, TPR, CDS2, CEPBZ, HMMR, ST18, COMMD3, MCM7, XRCC6, IVNS1ABP, NR2F2, PAX2, PPARG, STA<br>T3, HTR7, NOV, RORA, FGFR4, GNE, CASP7, CD86, DNNTIP2, FUT2, LAMC2, RAC3, RBM9, UBE3C, ABCE1<br>, JARID1C, RBM4, ACOT7, ATP6V1E2, C5orf15, EXOSC10, IFIT2, NME1, RPN2, SNTB1, DNASE1L2, MS4A4<br>A, PHKG1, SNX17, CDH12, EEF1G                                                                                                                                                                                                                                                                                                                                                        |
| PFN-module_no22 | 71               | HIST1H2BF, PCNA, YBX1, HIST1H1E, TRIM28, HIST1H4E, ILF2, DLG7, HIST1H3H, TROAP, REL, PRC1, B<br>IRC5                                                                                                                                                                                                                                                                                                                                                                                                                                                                                                                                                                                                                                                                                                                                                                                                                                                                                                                                                                                                                                                                                                                                                                                                                                                                  |
| PFN-module_no26 | 121              | TSHB, ELAVL3, SERPINB2, DMN, FLJ33790, SNCB, NINJ2, KIAA0274, TBL3, LEF1, HOXA5, KL, SLC17A7, C<br>NGB1, SCUBE2, XRCC2, GUCY1A3, NKX2-5                                                                                                                                                                                                                                                                                                                                                                                                                                                                                                                                                                                                                                                                                                                                                                                                                                                                                                                                                                                                                                                                                                                                                                                                                               |
| PFN-module_no3  | 120              | RNF185, AMELY, GRM1, ALK, PRKCG, MYH6, GDDP5, SFTPA2, KCTD2, SEMA3B, EPHA4, CCNG1, FOLR1<br>, ARHGDI, GML, LLGL2, SLC6A12, TP53I11                                                                                                                                                                                                                                                                                                                                                                                                                                                                                                                                                                                                                                                                                                                                                                                                                                                                                                                                                                                                                                                                                                                                                                                                                                    |
| PFN-module_no30 | 85               | MAG, MMP13, IFNA21, NEFH, MMP15, PSG3, STC2, OLFM1, SOX3, EDN2, DEFA4, ALPL2                                                                                                                                                                                                                                                                                                                                                                                                                                                                                                                                                                                                                                                                                                                                                                                                                                                                                                                                                                                                                                                                                                                                                                                                                                                                                          |
| PFN-module_no32 | 133              | POU4F2, PGC, CTRC, AQP6, C1orf61, GUCY2D, CKM, SCNN1G, TSPYL5, FUT3, MME, IVL, PSG1, SLC5A6,<br>RBMX, DNASE1L3, DPEP1, RHD, SCEL, LAMA3, AMACR, EDN2, IRX5                                                                                                                                                                                                                                                                                                                                                                                                                                                                                                                                                                                                                                                                                                                                                                                                                                                                                                                                                                                                                                                                                                                                                                                                            |

|                 |      |                                                                                                                                                                                                                                                                                                                                                                                                                                                                                                                                                                                                                                                                                                                                                                                                                                                                                                                                                                                                                                                                                                                                                                                                                                                                                                                 |
|-----------------|------|-----------------------------------------------------------------------------------------------------------------------------------------------------------------------------------------------------------------------------------------------------------------------------------------------------------------------------------------------------------------------------------------------------------------------------------------------------------------------------------------------------------------------------------------------------------------------------------------------------------------------------------------------------------------------------------------------------------------------------------------------------------------------------------------------------------------------------------------------------------------------------------------------------------------------------------------------------------------------------------------------------------------------------------------------------------------------------------------------------------------------------------------------------------------------------------------------------------------------------------------------------------------------------------------------------------------|
| PFN-module_no33 | 223  | GPR109B,PRL,NAP1L3,CNTN2,SART3,RBP3,OPRM1,TH,TEK,CRHR1,LIPF,SFTPC,ARF4,EIF4A1,TP73L,ATP5D,SEPHS1,ALAS2,MFAP5,COX6A1,EPM2AIP1,IL11RA,NPY5R,MAEA,SLC14A1,HAGH,POLR3D,SPINK5,TMEM187,H2AFZ,GSTM1,IL9R,USP14,GPSN2,COX5B,ITSN1,SLC6A3,ISG15,MYBPC3,CHI3L1,GRIA1,ABCB4,SYNGR1,MLN                                                                                                                                                                                                                                                                                                                                                                                                                                                                                                                                                                                                                                                                                                                                                                                                                                                                                                                                                                                                                                    |
| PFN-module_no34 | 104  | REN,CPA2,EFNA3,HSPB2,STAT4,IRX4,CRYGD,BLMH,CD93,CTAG1B,MN1,ARSA,ICAM4,TRAF5,ING3,ZNF165,GNF5,TAF6,ZNF593                                                                                                                                                                                                                                                                                                                                                                                                                                                                                                                                                                                                                                                                                                                                                                                                                                                                                                                                                                                                                                                                                                                                                                                                        |
| PFN-module_no37 | 117  | CTRC,PGC,AQP6,POU4F2,MME,C1orf61,FUT3,SLC5A6,PPY,CKM,GUCY2D,SCNN1G,TSPYL5,LAMA3,AMACR,AMPD1,IRX5,RHD,RBMX,PRKACG                                                                                                                                                                                                                                                                                                                                                                                                                                                                                                                                                                                                                                                                                                                                                                                                                                                                                                                                                                                                                                                                                                                                                                                                |
| PFN-module_no4  | 126  | RAPGEF1,CNP,FDPS,CDKN2D,PPP2R5B,ELK1,FKBP1A,EHMT2,PIK3R2,TCF3,FOXO3,ST6GAL1,DAP,TAF7,ARHGEF12,PGK1,EXT1,TNIP1                                                                                                                                                                                                                                                                                                                                                                                                                                                                                                                                                                                                                                                                                                                                                                                                                                                                                                                                                                                                                                                                                                                                                                                                   |
| PFN-module_no51 | 1760 | LCN1,SEC11A,RPL13,ST13,SF3A1,IFNA5,SURF1,RPS3A,DMBT1,CTBP1,CLIC4,CA6,ILF3,SMS,DHCR24,PPP2CB,THBS2,STX4,VIL2,MAP2K5,UQCRFS1,MOXD1,MMP19,CEACAM8,HIP2,COL6A3,GALNT10,SDC2,RAB5A,COPS8,RGS10,PSMD7,KLHDC3,RQCD1,TFAP2C,RAB2A,ATP6V1C1,TNFRSF8,C21orf91,HNRPA2B1,PRAF2,NDUFB7,DDX3Y,IER3,ARL2BP,BPGM,DAG1,FRG1,PHF21A,SMARCD2,ABCF3,FARSA,PMM2,PPP1R7,PPP3CA,PDAP1,HLA-F,PPP2R5C,RAD23B,SAT1,ATP1B1,SNAPC5,TRIM14,SDC4,BCAT2,PPARD,PSMD6,ADRM1,RPS6KB2,NIPSNAP1,NDUFB1,MAPKAPK3,CREB1,PLK2,TRIM26,TSN,ARHGDIB,DNAJA1,PC,PIK4CB,APP,FN1,RPS6KB1,ANXA7,CSTF2,TRAK2,PDXK,AES,SLC22A18,UQCRC1,EPAS1,SNAI2,CITED2,EIF3S10,AKR1B1,CD151,HIST1H4C,EIF2S1,BMI1,GIPC1,DDX17,TCTA,UBXD6,USP34,FOXA1,PAFAH1B2,PCBP2,SRRM2,ZEB1,LAMB2,HNRPC,REL,TJP1,PTTG1,MRPL12,PENK,PPIH,SAFB2,LTB,PARK7,GUK1,LSM3,PRKACA,SERPINA1,ATP2A3,TMEM97,RPL36AL,SSR4,NGFRAP1,CD3E,CD46,HLA-DQB1,XRCC5,CLTB,CNIH,ELK1,CNP,LUM,RARRES1,CRK,CD52,GTFF2A1,PGK1,APOB,EVI2B,TOP2A,C4BPB,PTPRC,GNB1,HOXB5,PIB5PA,RAPGEF1,POLR2J,TAF11,ZNF3,CYB5A,ELAVL1,PCK2,FCGR1A,MGST2,PPP38,HADHB,NPC2,AP3S1,ECHS1,IGJ,PPIB,ZNF423,ATP5O,COPS2,PIK3CA,PSEN1,RBM39,UCK2,PSCD1,RAC2,APOC2,COL3A1,IFRD2,BRE,PLS3,BRD8,LY96,PSMA7,TUBG1,ACAT1,FABP4,MRPS31,NEK2,RYK,UCN,ZNF22,DDX1,FDPS,COL1A2,COL1A1,ECM2,SNRPB2,ANP32B,MFA P4,REEP5,CXCL12,FKBP1A,TNIP1,KNG1,TAF7,TMEPAI |
| PFN-module_no52 | 160  | POU4F2,CTRC,PGC,AQP6,CKM,C1orf61,RHD,IVL,FUT3,GUCY2D,SCNN1G,TSPYL5,MME,DNASE1L3,PSG1,SLC5A6,RBMX,DPEP1,PPY,AMPD1,SCEL,LAMA3,SERHL2,AMACR,PRKACG                                                                                                                                                                                                                                                                                                                                                                                                                                                                                                                                                                                                                                                                                                                                                                                                                                                                                                                                                                                                                                                                                                                                                                 |
| PFN-module_no53 | 273  | ACOX2,ADH1B,SEC14L2,MTHFD1,HSD11B1,DCXR,CPB2,AQP9,ALDH6A1,CDO1,HPD,APOC4,ADH6,DBT,PKM2,SERPINC1,RGN,NR1I3,SCP2,PCK2,PAH,GCDH,PON3,FLJ20699,SLC10A1,TAT,C6,FAAH,PPARA,C4BPA,HGD,SULT2A1,ACY1,CAT,PCSK6                                                                                                                                                                                                                                                                                                                                                                                                                                                                                                                                                                                                                                                                                                                                                                                                                                                                                                                                                                                                                                                                                                           |
| PFN-module_no54 | 548  | NOX4,AMELX,GHRH,CARTPT,ATBF1,NEUROD1,MMP8,FOXF2,GRK1,TPH1,PKMYT1,LGALS7,PDE4A,CCNU,MC4R,TGFB2,KIF14,OCA2,ART3,PRR5,PLAGL1,CBFA2T3,RPA3,SPINK2,FCGBP,GNAO1,GNRH1,AIM1,NEFM,DEGS1,FEV,COL4A3,SFRS11,NR2C1,KIAA1539,ANGPTL4,NUP214,ILVBL,EEF1A2,IL13RA1,KBTBD10,TMEM4,TNNI1,TDGF1,ADCY2,CHRNA2,PFTK1,CYP11A1,DUSP9,MYL4,SALL1,NEBL,SLC14A2,ECE2,PSMB4,UBXD2,RPL11,SPRR3,CCR1,GPR116,SERPINB7,TBX5,BCL2L1,MYOZ2,SYPL1,LAMA4,SLC34A1,TACR3,SRPK3,PLAUR,GABRA1                                                                                                                                                                                                                                                                                                                                                                                                                                                                                                                                                                                                                                                                                                                                                                                                                                                        |
| PFN-module_no56 | 696  | LBX1,SOX11,IFNA1,LALBA,BMPR1B,CACNG1,LRP2,MYT1,GPR3,EPYC,ELAVL3,STAR,FABP7,CYP2A7,DRD5,WNT1,NEUROD2,PSG6,NEUROG1,CSR3,OR2H1,PRM1,SCD5,COX7A1,PPM1E,TSHB,CSF3,SERPINB2,GABRB1,CHRN2,MCF2,CLUL1,KIF2C,DMN,NDP,ACRV1,CRISP1,BMP4,MPL,CD1A,KRT81,MOG,ATP12A,AMPH,BRAF,FLJ33790,PTK2,SNCB,CEP350,NUAK1,CUL4B,NPPA,PYY,RIT2,BLK,CYP24A1,KRT76,NINJ2,PRSS1,DNTT,KRT75,MAGEA9,KIAA0274,SUMO1,CCL1,CDH8,CST1,HTR6,ZP2,MYOC,SCG2,VIP,ADORA2B,DLG3,HOXA1,KLK6,KRT13,LEFTY2,ATP1A2,DLX2,HTR2A,NHLH2,SLC2A5,CCR5,GPR143,GYPE,OPRM1,TBL3,PLP1,TRPM8,DUSP2,GUCY1A3,TBR1,CRYBB1                                                                                                                                                                                                                                                                                                                                                                                                                                                                                                                                                                                                                                                                                                                                                 |
| PFN-module_no57 | 129  | RNF185,AMELY,GRM1,ALK,PRKCG,MYH6,GDPD5,SFTPA2,SEMA3B,KCTD2,EPHA4,CCNG1,MAPK8,FOLR1,ARHGDIG,GML,LLGL2,SLC6A12,TP53I11,NR5A1                                                                                                                                                                                                                                                                                                                                                                                                                                                                                                                                                                                                                                                                                                                                                                                                                                                                                                                                                                                                                                                                                                                                                                                      |
| PFN-module_no6  | 124  | IGFBP7,LUM,MFAP4,CXCL12,GEM,COL6A2,TAGLN,AEBP1,COL3A1,PTGIS,EPHA3,C7,HGF,BGN,BMP5,COL1A2,FILIP1L,GFPT2,TMEPAI                                                                                                                                                                                                                                                                                                                                                                                                                                                                                                                                                                                                                                                                                                                                                                                                                                                                                                                                                                                                                                                                                                                                                                                                   |
| PFN-module_no9  | 498  | NOX4,AMELX,ATBF1,CARTPT,NEUROD1,GHRH,TPH1,FOXF2,GRK1,PKMYT1,MMP8,PDE4A,LGALS7,CCNU,OCA2,CBFA2T3,GNAO1,GNRH1,AIM1,FEV,TGFB2,ART3,SFRS11,KIF14,RPA3,FCGBP,KIAA1539,ILVBL,NEFM,DEGS1,TMEM4,COL4A3,NR2C1,PLAGL1,PRR5,TDGF1,ADCY2,NUP214,PFTK1,EEF1A2,TNNI1,DUSP9,MYL4,SALL1,SLC14A2,ECE2,PSMB4,UBXD2,ANGPTL4,CYP11A1,IL13RA1,CCR1,GPR116,SERPINB7,TBX5,BCL2L1,SYPL1,LAMA4,NEBL,SLC34A1,KRT32,KBTBD10,SRPK3,USP9X,ZNF711,ARID1A,INSR,ARNT2,PLAUR,GABRA1                                                                                                                                                                                                                                                                                                                                                                                                                                                                                                                                                                                                                                                                                                                                                                                                                                                              |



**Table S9**

Gene regulatory network modules associated with histopathological features in the validation set.  
(Gene Set Enrichment Analysis)

| Histopathological feature | Gene subnetwork | NES  | p-value | FDR   |
|---------------------------|-----------------|------|---------|-------|
| Microtrabecular           | PFN-MODULE_NO13 | 1.85 | 0.002   | 0.034 |
|                           | PFN-MODULE_NO53 | 1.85 | 0.002   | 0.018 |
|                           | PFN-MODULE_NO33 | 1.71 | 0.010   | 0.070 |
| Macrotrabecular/Compact   | PFN-MODULE_NO22 | 1.73 | 0.004   | 0.170 |
|                           | PFN-MODULE_NO15 | 1.66 | 0.035   | 0.165 |
| SH-HCC                    | PFN-MODULE_NO6  | 1.79 | <0.001  | 0.098 |
| Pseudoglandular           | PFN-MODULE_NO56 | 1.86 | 0.003   | 0.055 |
|                           | PFN-MODULE_NO18 | 1.78 | 0.016   | 0.080 |
| Fatty change              | PFN-MODULE_NO20 | 1.82 | 0.024   | 0.085 |

SH-HCC: steatohepatic hepatocellular carcinoma, NES: normalized enrichment score,  
FDR: false discovery rate.

**Table S10**

Prognostic association of HCC molecular subclasses (univariable Cox regression modeling)

|             | Training set |             |         | Validation set |             |         |
|-------------|--------------|-------------|---------|----------------|-------------|---------|
|             | HR           | 95%CI       | p-value | HR             | 95%CI       | p-value |
| S1 subclass |              |             |         |                |             |         |
| Death       | 0.76         | 0.39 - 1.47 | 0.41    | 0.89           | 0.49 - 1.64 | 0.72    |
| Recurrence  | 1.03         | 0.64 - 1.65 | 0.91    | 0.93           | 0.54 - 1.61 | 0.81    |
| S2 subclass |              |             |         |                |             |         |
| Death       | 0.56         | 0.25 - 1.27 | 0.17    | 0.95           | 0.53 - 1.73 | 0.88    |
| Recurrence  | 0.94         | 0.55 - 1.61 | 0.83    | 0.97           | 0.55 - 1.69 | 0.91    |
| S3 subclass |              |             |         |                |             |         |
| Death       | 1.78         | 0.99 - 3.20 | 0.05    | 1.14           | 0.67 - 1.96 | 0.63    |
| Recurrence  | 1.02         | 0.66 - 1.57 | 0.94    | 1.09           | 0.66 - 1.81 | 0.73    |

HCC: hepatocellular carcinoma, HR: hazard ratio, CI: confidence interval.

**Table S11**

Performance of clinicopathological indices predictive of HCC molecular subclasses optimized for sensitivity/specificity.

| Molecular subclass | Training set |             |             |     |     | Validation set |             |             |     |     |
|--------------------|--------------|-------------|-------------|-----|-----|----------------|-------------|-------------|-----|-----|
|                    | AUROC        | Sensitivity | Specificity | PPV | NPV | AUROC          | Sensitivity | Specificity | PPV | NPV |
| S1                 | 0.69         | 70%         | 58%         | 43% | 81% | 0.71           | 83%         | 49%         | 42% | 87% |
| S2                 | 0.86         | 82%         | 81%         | 63% | 92% | 0.77           | 86%         | 69%         | 43% | 95% |
| S3                 | 0.83         | 69%         | 81%         | 71% | 79% | 0.73           | 65%         | 75%         | 71% | 69% |

Molecular subclass predictions using the clinico-histopathological indices were based on the following formulae and cut-off values optimized for sensitivity/specificity in the training set:

S1 = 1.45 x SH-HCC (0: no, 1: yes) + 1.18 x Immune cell infiltrate (0: 0-1, 1: 2); > 0.59 was predicted as S1 subclass.

S2 = 2.48 x macrotrabecular/compact (0: no, 1: yes) + 2.38 x serum alpha-fetoprotein (0: ≤ 400 ng/mL; 1: > 400 ng/mL) - 1.50 x pseudoglandular (0: no, 1: yes); > 1.68 was predicted as S2 subclass.

S3 = 1.37 x microtrabecular (0: no, 1: yes) - 2.97 x SH-HCC (0: no, 1: yes) - 1.59 x clear cell (0: no, 1: yes) - 1.13 x tumor grade (0: Edmondson-Steiner III or IV, 1: Edmondson-Steiner I or II); > 1.94 was predicted as S3 subclass.

HCC: hepatocellular carcinoma, AUROC: area under receiver operating characteristic curve, PPV: positive predictive value, NPV: negative predictive value, SH-HCC: steatopathic HCC, HBV: hepatitis B virus.

**Table S12**

Required sample size in clinical trial and NNT in HCC molecular subclass-targeting therapy.

| Molecular subclass       |                                  | S1 (prevalence: 30%) |     |     | S2 (prevalence: 25%) |     |     | S3 (prevalence: 45%) |     |     |
|--------------------------|----------------------------------|----------------------|-----|-----|----------------------|-----|-----|----------------------|-----|-----|
| ORR in targeted subclass |                                  | 0.5                  | 0.6 | 0.7 | 0.5                  | 0.6 | 0.7 | 0.5                  | 0.6 | 0.7 |
| Sample size              | All comers                       | 184                  | 121 | 88  | 293                  | 184 | 129 | 76                   | 53  | 39  |
|                          | Subclass index-positive patients | 43                   | 30  | 22  | 62                   | 43  | 32  | 31                   | 22  | 16  |
| NNT                      | All comers                       | 6.7                  | 5.6 | 4.8 | 8.0                  | 6.7 | 5.7 | 4.4                  | 3.7 | 3.2 |
|                          | Subclass index-positive patients | 3.3                  | 2.8 | 2.4 | 4.0                  | 3.3 | 2.9 | 2.8                  | 2.3 | 2.0 |

Required sample sizes in one arm are shown (alpha=0.05, power=0.9). ORR: objective response rate, NNT: number needed to treat.

**Table S13**

Prognostic association of clear cell variant in literature.

| Characteristic            | Yang, et al.                                                   |                           | Emile, et al.*               |                           | Liu, et al.                        |                           | Lai, et al.                    |                          | Audisio, et al.**              |                           |
|---------------------------|----------------------------------------------------------------|---------------------------|------------------------------|---------------------------|------------------------------------|---------------------------|--------------------------------|--------------------------|--------------------------------|---------------------------|
|                           | Clear cell<br>(n=97)                                           | Non-clear cell<br>(n=118) | Clear cell<br>(n=10)         | Non-clear cell<br>(n=108) | Clear cell<br>(n=43)               | Non-clear cell<br>(n=597) | Clear cell<br>(n=29)           | Non-clear cell<br>(n=50) | Clear cell<br>(n=7)            | Non-clear cell<br>(n=130) |
| Male                      | 69 (71%)                                                       | 103 (87%)                 | 8 (80%)                      | 86 (80%)                  | 32 (74%)                           | 486 (81%)                 |                                |                          |                                |                           |
| Hepatitis B infection     | 16 (16%)                                                       | 12 (10%)                  | 2 (20%)                      | 25 (22%)                  | 37 (86%)                           | 443 (74%)                 |                                |                          |                                |                           |
| Hepatitis C infection     | 47 (48%)                                                       | 52 (44%)                  | 4 (40%)                      | 44 (41%)                  | 6 (14%)                            | 7 (1.2%)                  |                                |                          |                                |                           |
| Hepatitis B & C infection | 4 (4%)                                                         | 1 (1%)                    | 0 (0%)                       | 2 (2%)                    |                                    |                           |                                |                          |                                |                           |
| Alcohol                   | NA                                                             | NA                        | 2 (20%)                      | 15 (14%)                  |                                    |                           |                                |                          |                                |                           |
| Cirrhosis                 | 74 (76%)                                                       | 70 (59%)                  | 10 (100%)                    | 108 (100%)                | 33 (77%)                           | 514 (86%)                 |                                |                          |                                |                           |
| Tumor stage               | Mostly early-intermediate stage                                |                           | Mostly early stage           |                           | Mostly intermediate-advanced stage |                           | All advanced stage             |                          |                                |                           |
| Treatment                 | Resection                                                      |                           | Liver transplant             |                           | Resection                          |                           | Best supportive care           |                          |                                |                           |
| Prognosis                 | Trend of poorer prognosis and earlier recurrence in clear cell |                           | No difference                |                           | Better prognosis in clear cell     |                           | Better prognosis in clear cell |                          | Poorer prognosis in clear cell |                           |
| Reference                 | Pathol Int 46;503 (1996)                                       |                           | Histopathology 38;225 (2001) |                           | Hepatol Res 38;291 (2008)          |                           | Cancer 44;1677 (1979)          |                          | Tumori 73;389 (1987)           |                           |

\*Only tumors with &gt; 90% clear cells were classified as clear cell variant positive.

\*\*Only tumors with ≥ 50% clear cells were classified as clear cell variant positive.

## Supplementary figure legend

### **Figure S1. Study design.**

Histopathological evaluation and determination of HCC molecular subclass were performed in the training set (left), and clinicopathological feature-based indices predictive of the molecular subclasses were developed. The indices were subsequently tested in an independent validation set (right).

### **Figure S2. Concordance of HCC molecular subclass prediction between the full 619-gene signature and reduced 30-gene signature.**

The subclass prediction was repeated with the 30-gene signature in the 9 datasets using nearest template prediction algorithm as previously described [Cancer Res 69;7385-92,2009] and concordance with the original prediction made by the 619-gene signature was evaluated. Median concordances for the prediction of overall subclasses, S1, S2, and S3 subclasses were 85% (IQR: 80%-90%), 78% (IQR: 74%-88%), 86% (IQR: 82%-93%), and 85% (IQR: 84%-89%), respectively.

### **Figure S3. Induction of YAP target genes in S2 subclass (Gene Set Enrichment Analysis).**

The signature of YAP activation ([CORDENONSI\\_YAP\\_CONSERVED\\_SIGNATUE](#)) was significantly enriched with S2 subclass. NES: normalized enrichment score, FDR: false discovery rate.

### **Figure S4. The macrotrabecular/compact pattern-associated gene regulatory network modules (A: no.22, B: no.15) identified by Planar Filtered Network Analysis (PFNA).**

Red nodes indicate key driver genes in the module determined by Key Driver Analysis (KDA). Green circles indicate top or bottom 50 genes deregulated in the HCC tumors with the macrotrabecular/compact pattern in the validation set.

### **Figure S5. The pseudoglandular pattern-associated gene regulatory network module (no.56) identified by Planar Filtered Network Analysis (PFNA).**

Red nodes indicate key driver genes in the module determined by Key Driver Analysis (KDA). Green circles indicate top or bottom 50 genes deregulated in the HCC tumors with the pseudoglandular pattern in the validation set.

### **Figure S6.**

**The steatohepatic hepatocellular carcinoma (SH-HCC) variant-associated gene regulatory network module (no.6) identified by Planar Filtered Network Analysis (PFNA).**

Red nodes indicate key driver genes in the module determined by Key Driver Analysis (KDA). Yellow circles indicate top or bottom 50 genes deregulated in the HCC tumors with SH-HCC variant in the validation set.

**Figure S7.**

**Serum alpha-fetoprotein (AFP) levels according to HCC molecular subclasses in the training set.**

AFP levels were significantly higher in the S2 subclass compared to the rest ( $p < 0.001$ , Wilcoxon rank-sum test).

**Figure S8.**

**Correlation of clinicopathological features with HCC molecular subclasses (univariable logistic regression analysis). (A: training set, B: validation set)**

SH-HCC: steatohepatic hepatocellular carcinoma, DCP: des-gamma-carboxy prothrombin, AFP: alpha-fetoprotein, L3: lens culinaris agglutinin-reactive fraction 3, HCV: hepatitis C virus, HBV: hepatitis B virus.

**Figure S9.**

**Receiver operating characteristic (ROC) curves for the S1, S2, and S3 subclass-predictive indices based on clinicopathological features.**

Receiver operating characteristic (ROC) curves for the S1, S2, and S3 subclass-predictive indices based on tumor-related clinicopathological features in the training set (upper panels) and the validation set (lower panels). Red and black arrows indicate cut-off values optimized for PPV and sensitivity/specificity, respectively which were determined in the training set and applied to the validation set. AUROC: area under ROC curve.

**Figure S10.**

**Required sample size in clinical trial and NNT in HCC molecular subclass-targeting therapy.**

Sample size required to detect therapeutic response in clinical trial of HCC drugs (upper panel) and NNT (lower panel) based on the HCC molecular subclass-predictive indices were determined. Positive predictive value (PPV) for each subclass was derived from the validation set (Table 4). Sample sizes were calculated at alpha error of 0.05, power of 0.90, and treatment/control ratio of 1. Based on previously published biomarker-enriched clinical trials in lung cancer [39], ORRs of 50%, 60%, and 70% were tested. NNT: number needed to treat, ORR: objective response rate.

Figure S1

Training set

Validation set

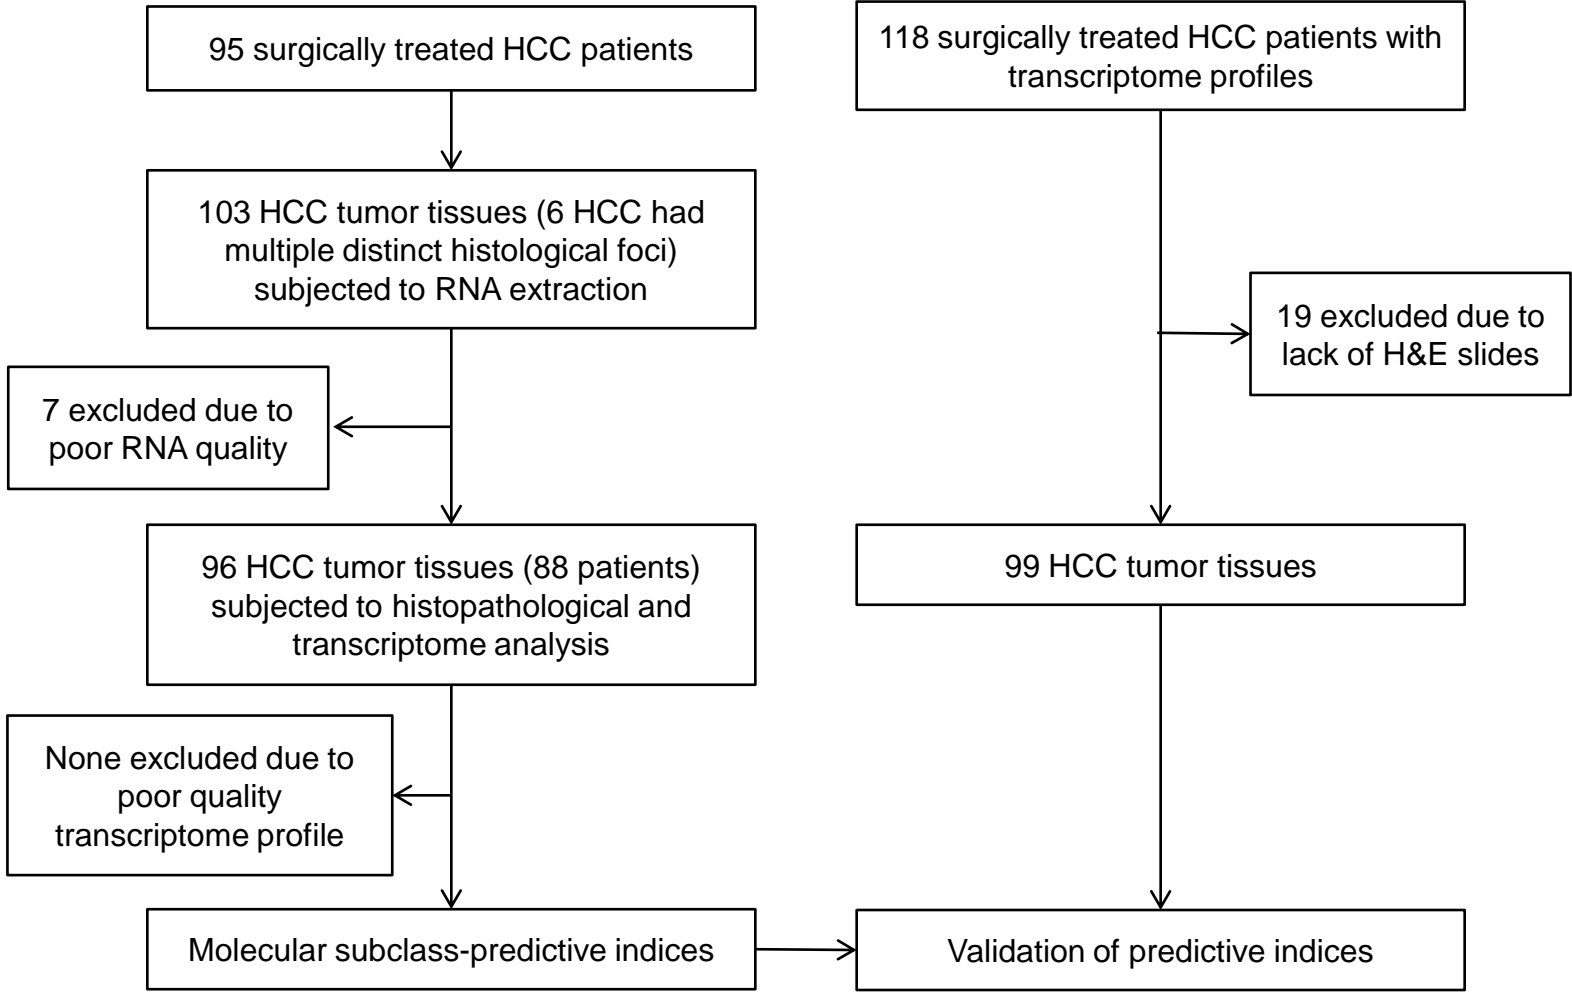



Figure S2

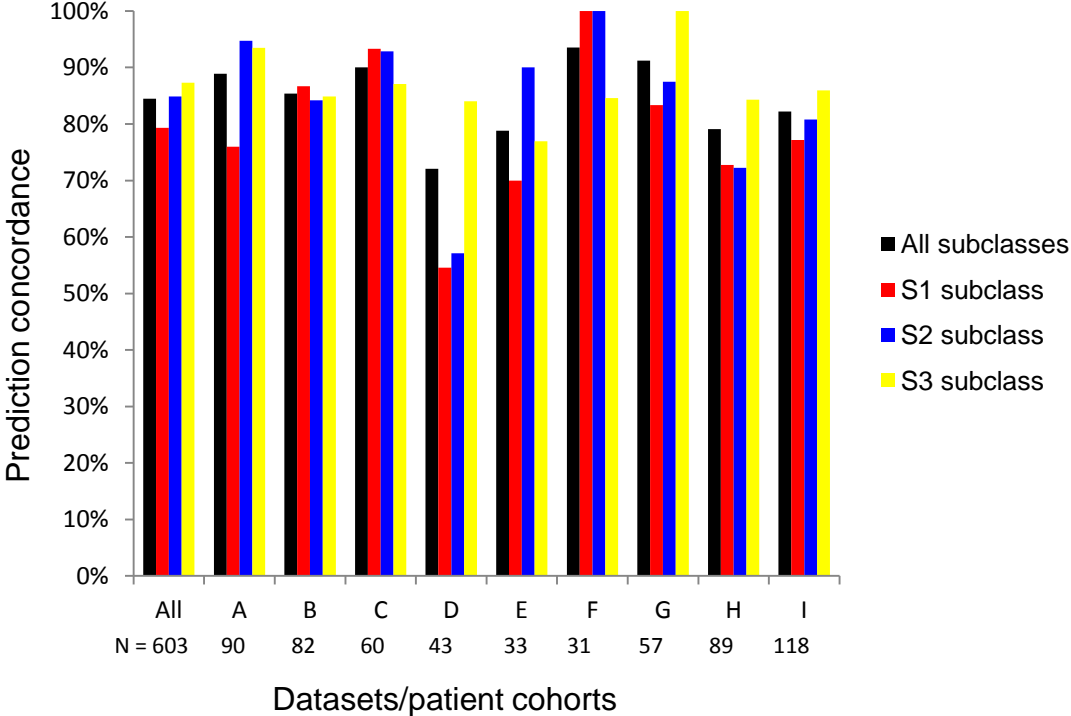

Figure S3

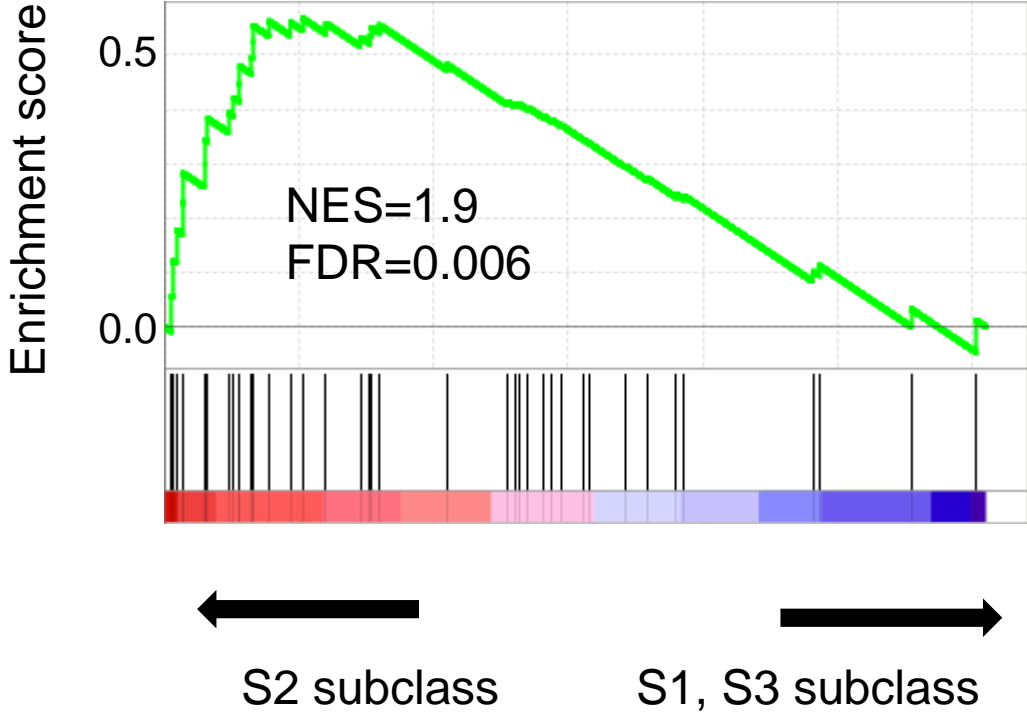

Figure S4A

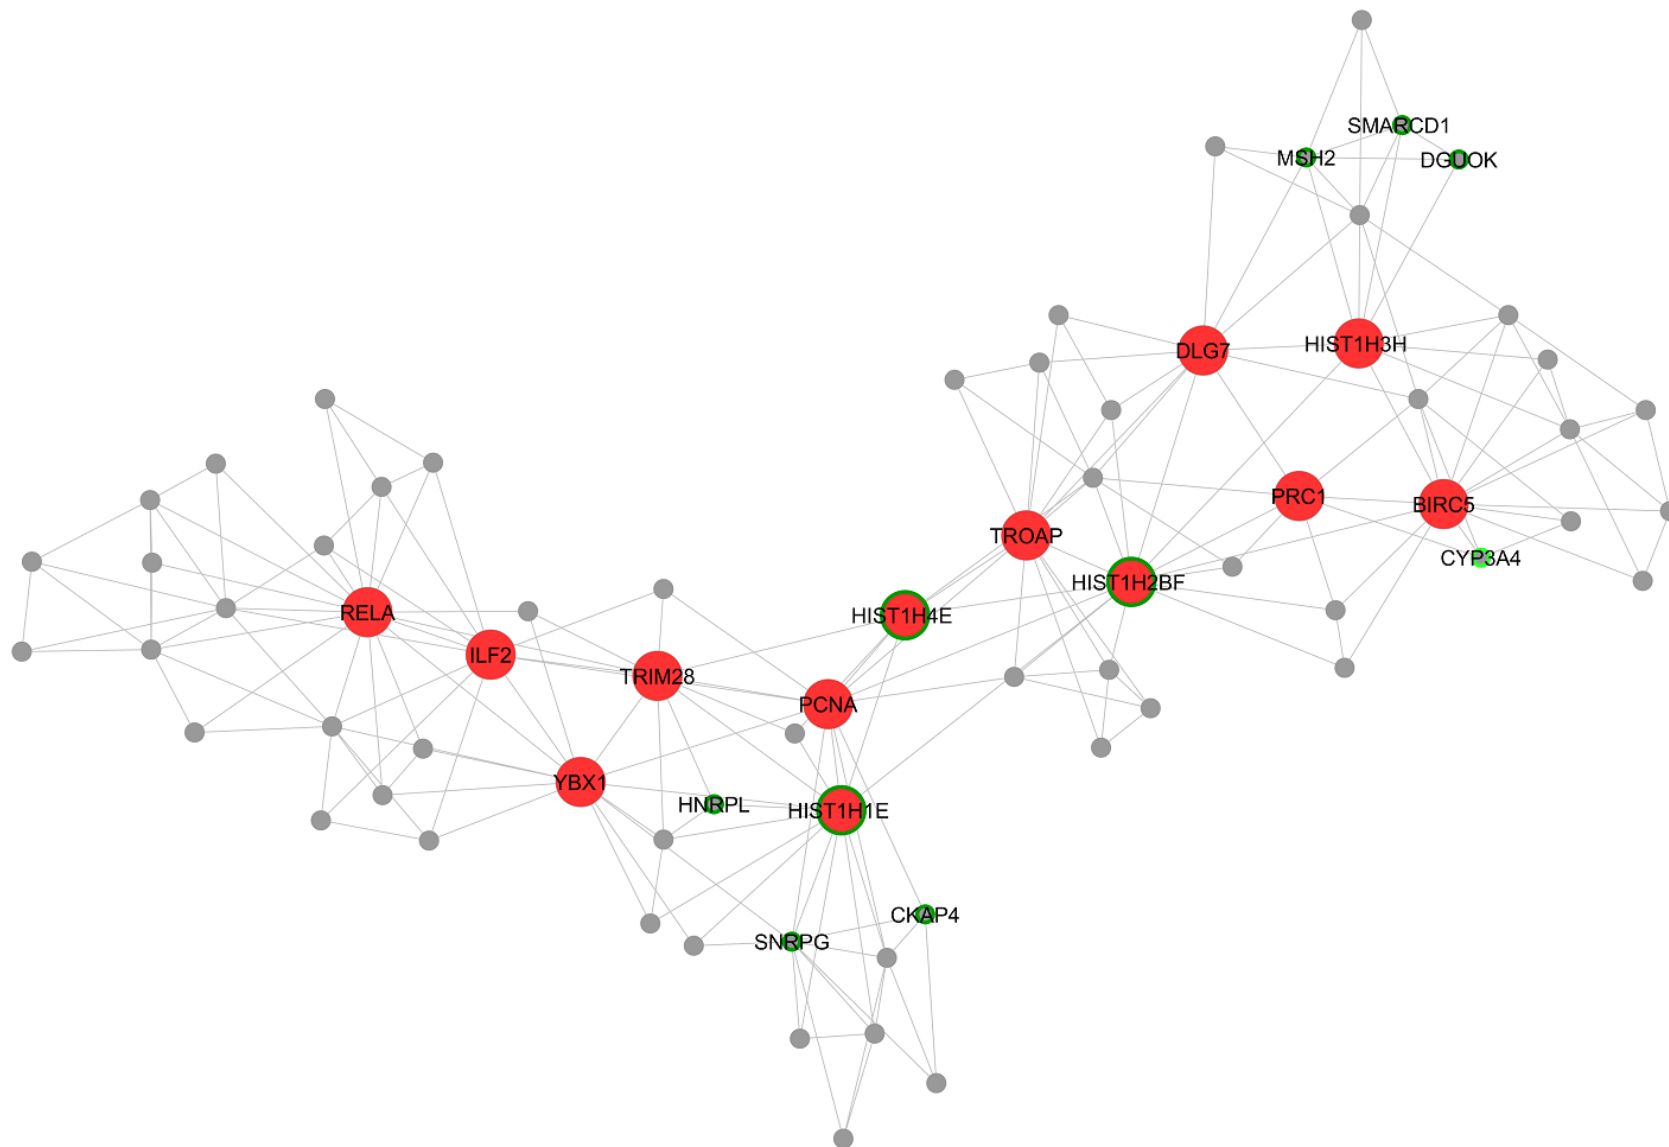

Figure S4B

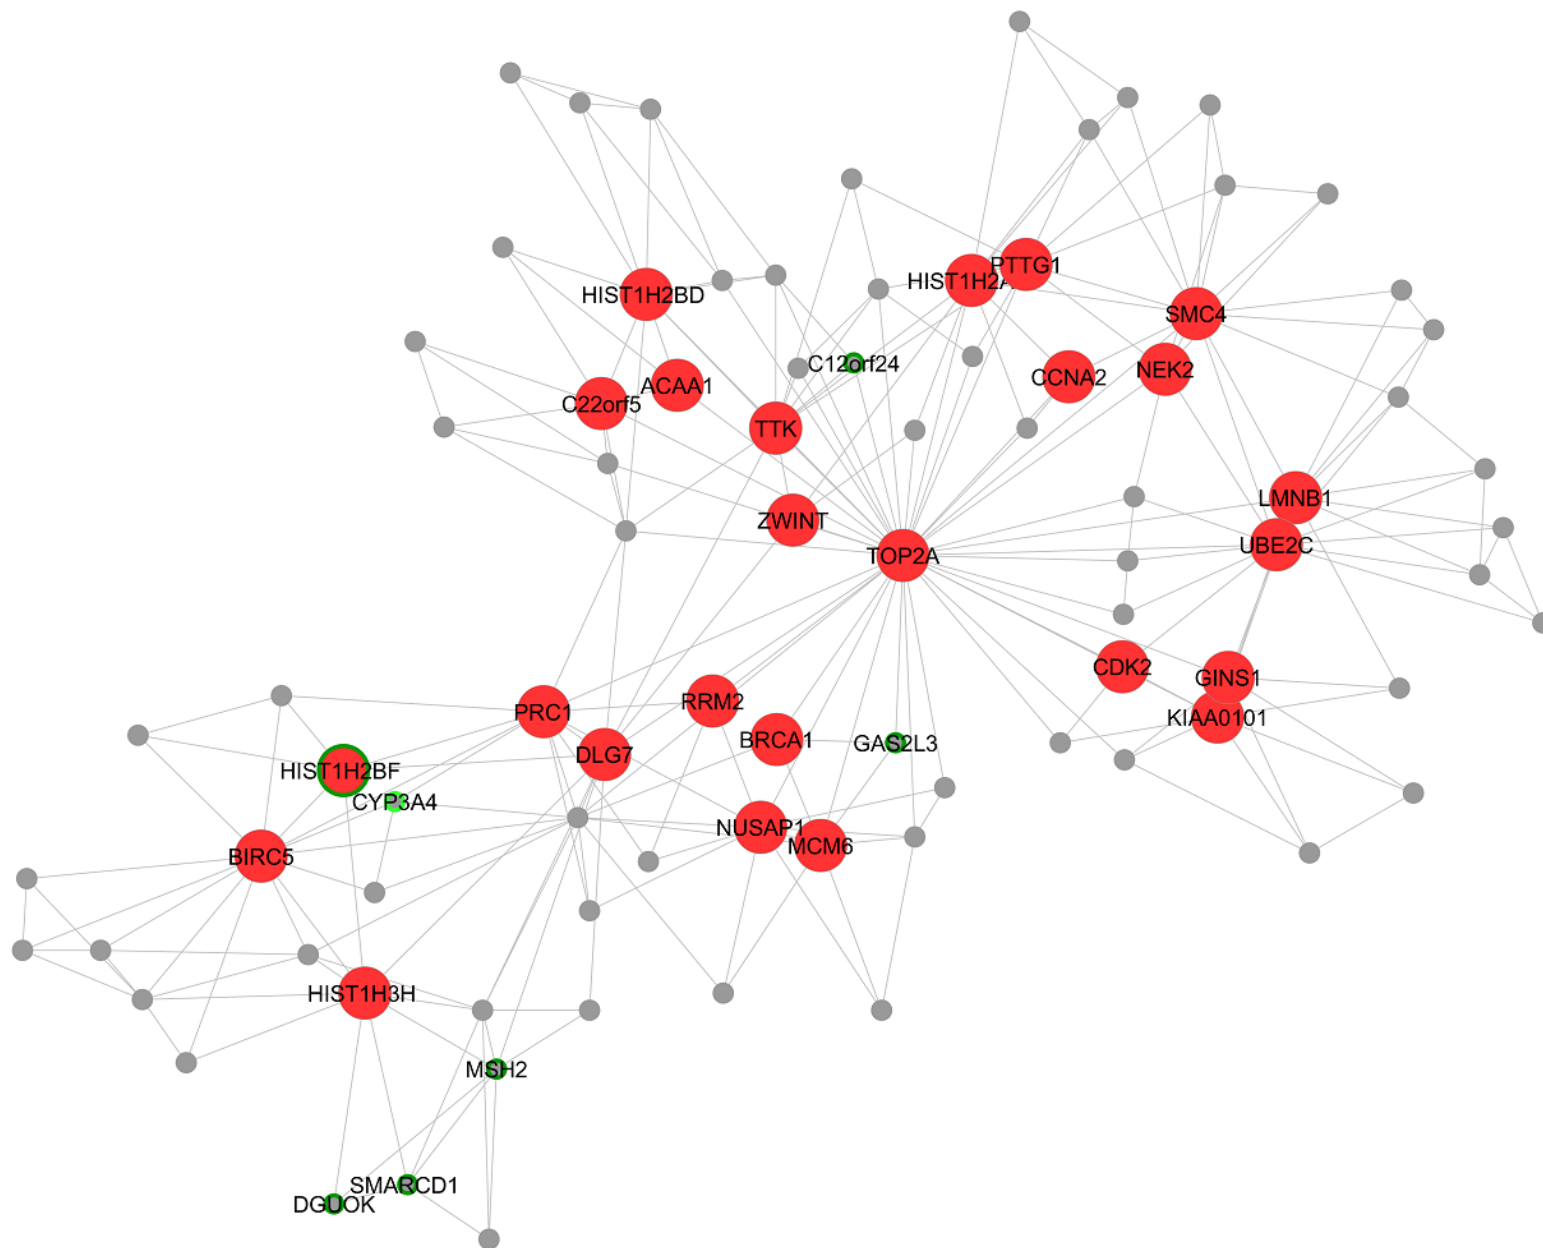

Figure S5

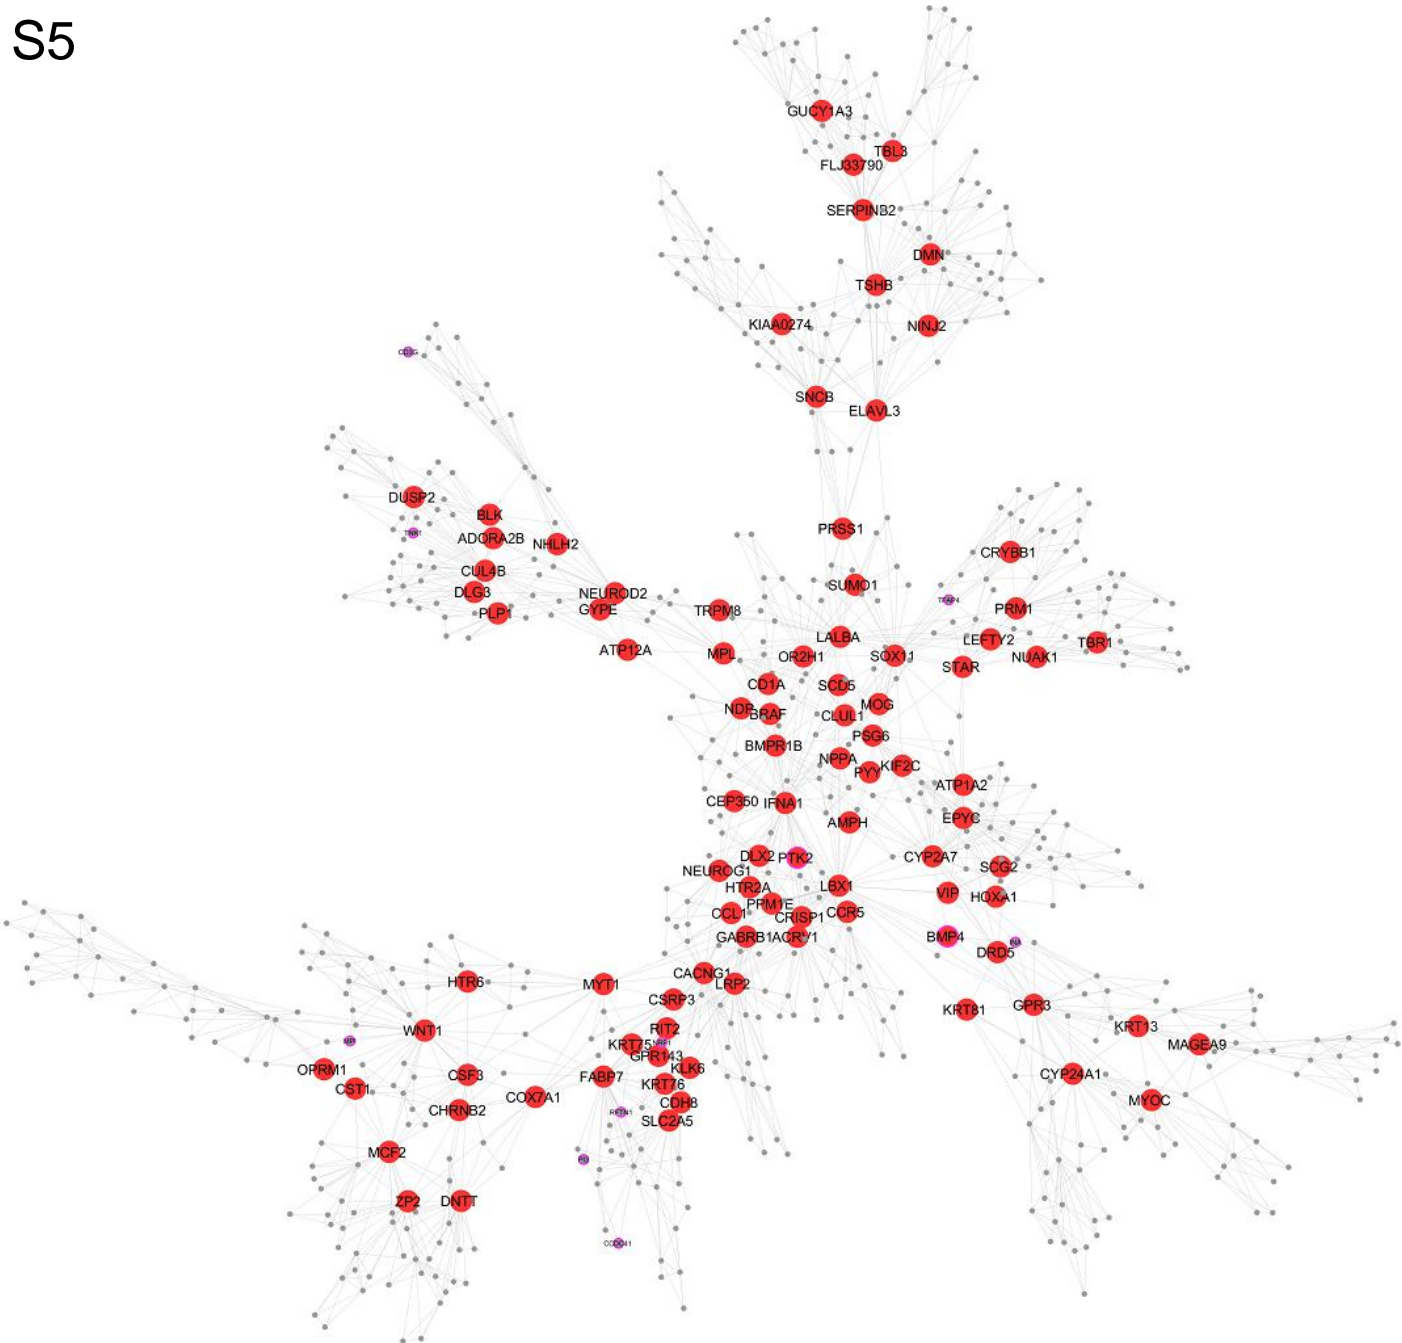

Figure S6

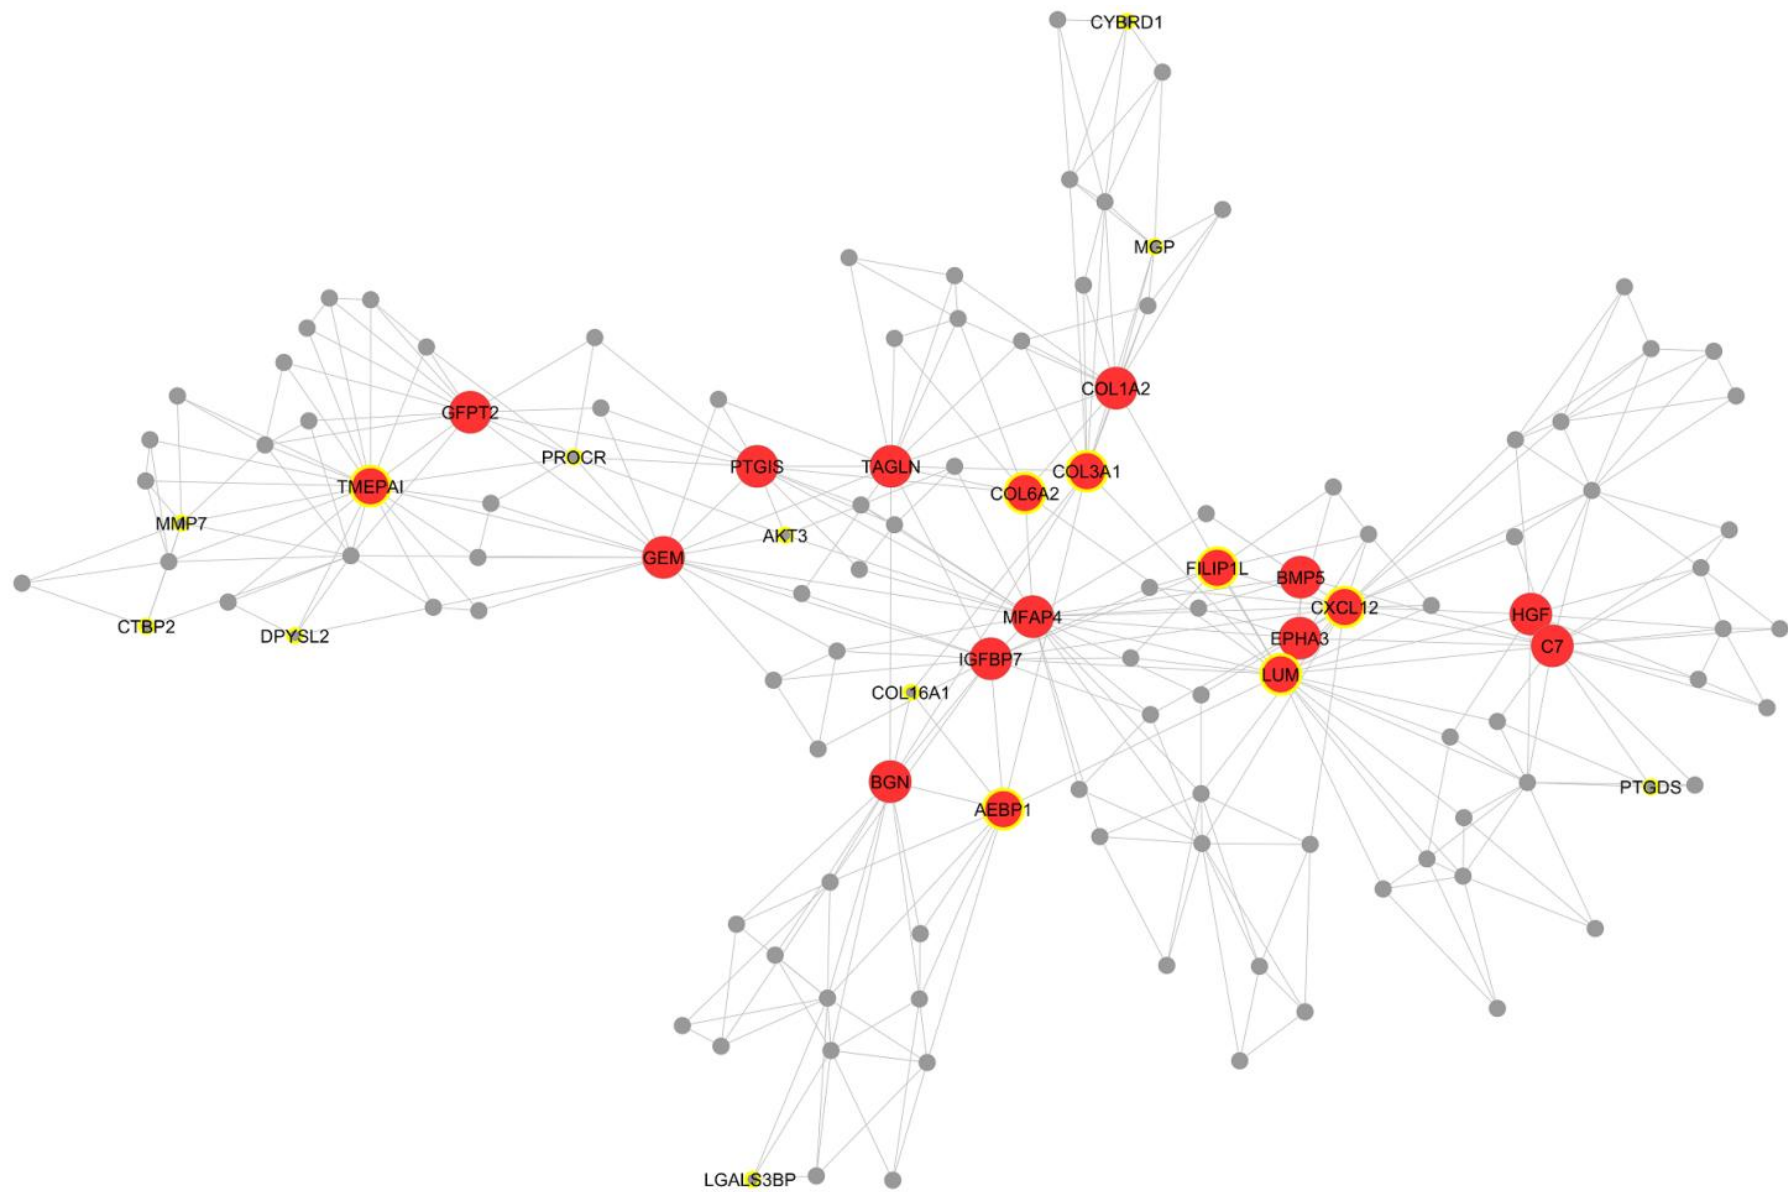

Figure S7

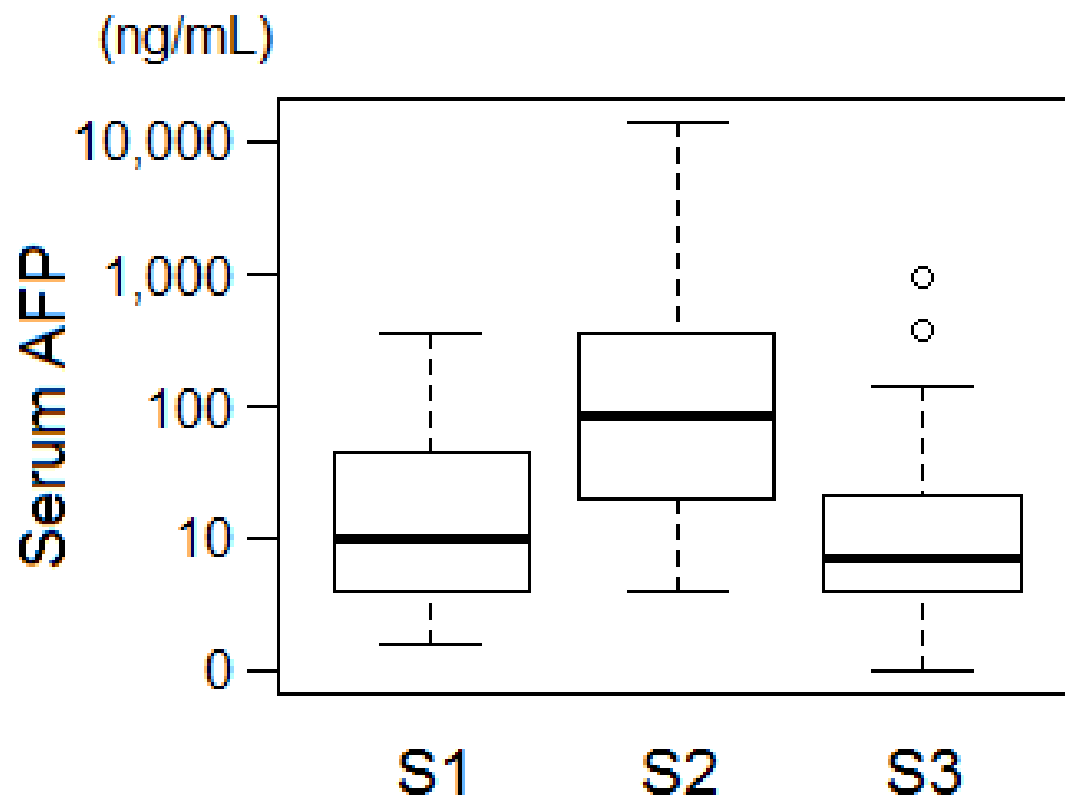

Figure S8A

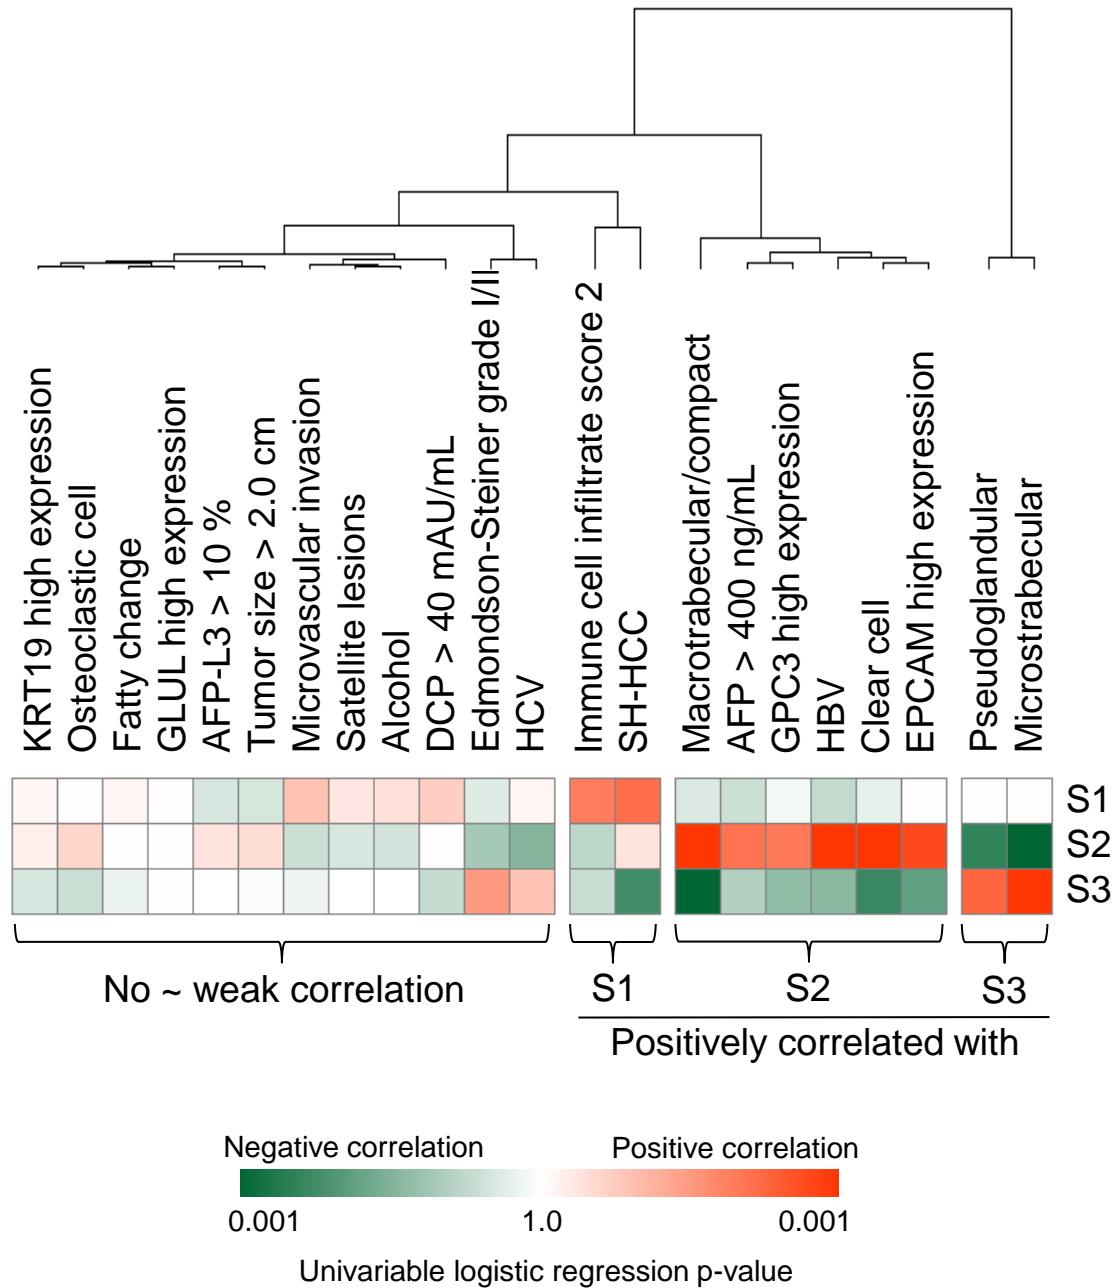



Figure S8B

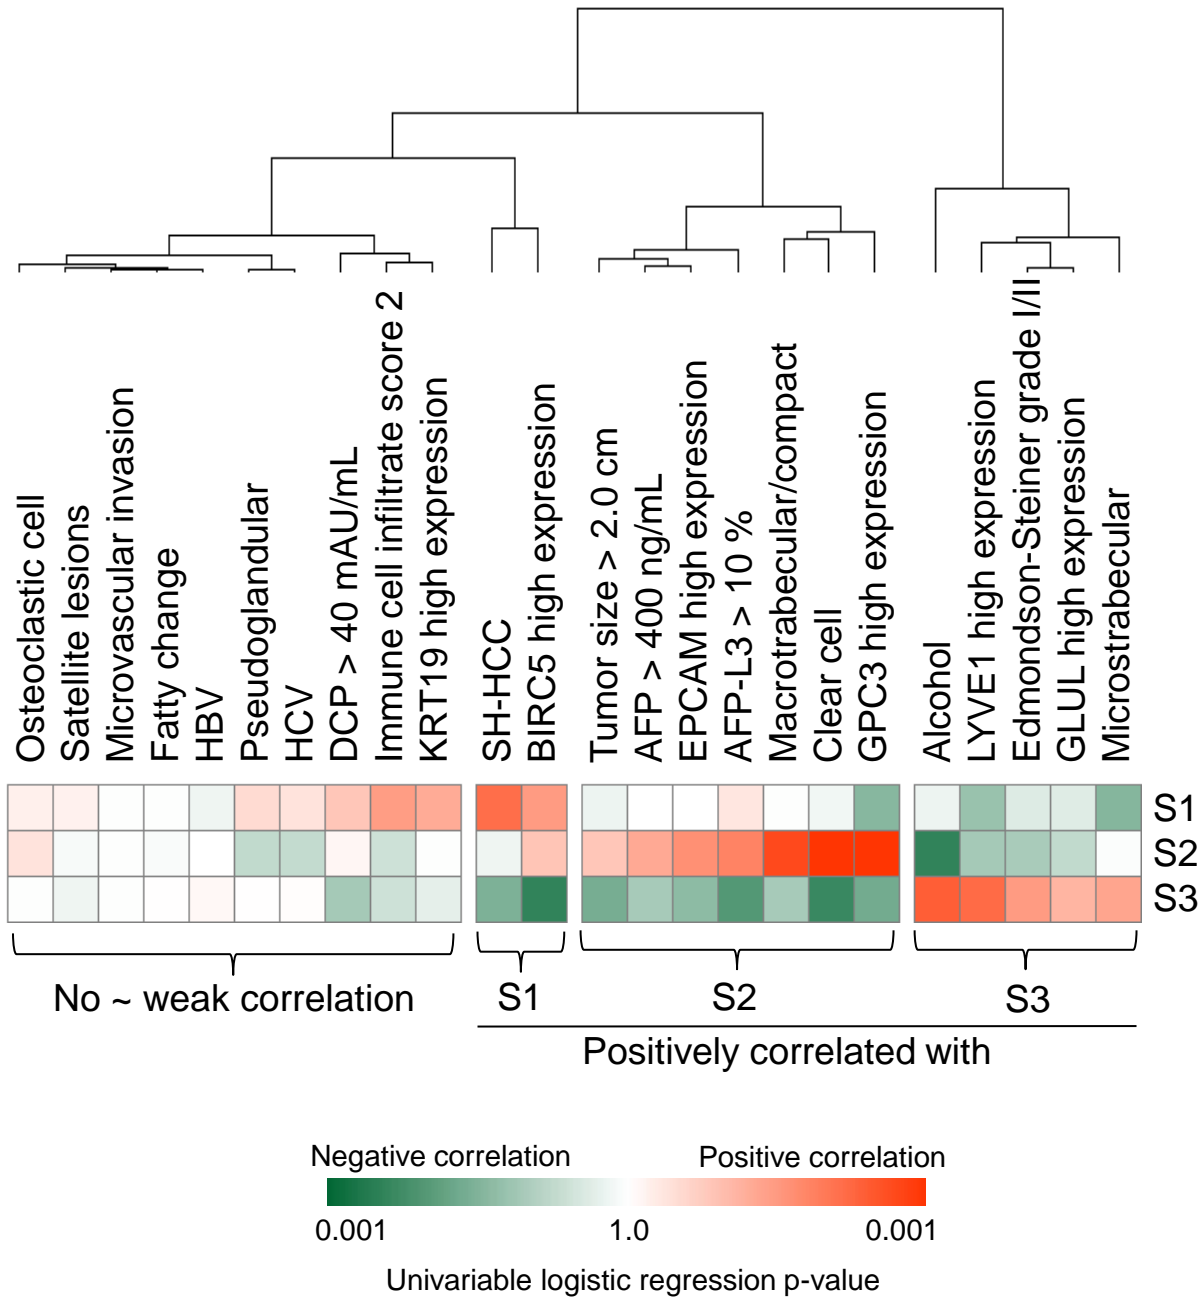

Figure S9

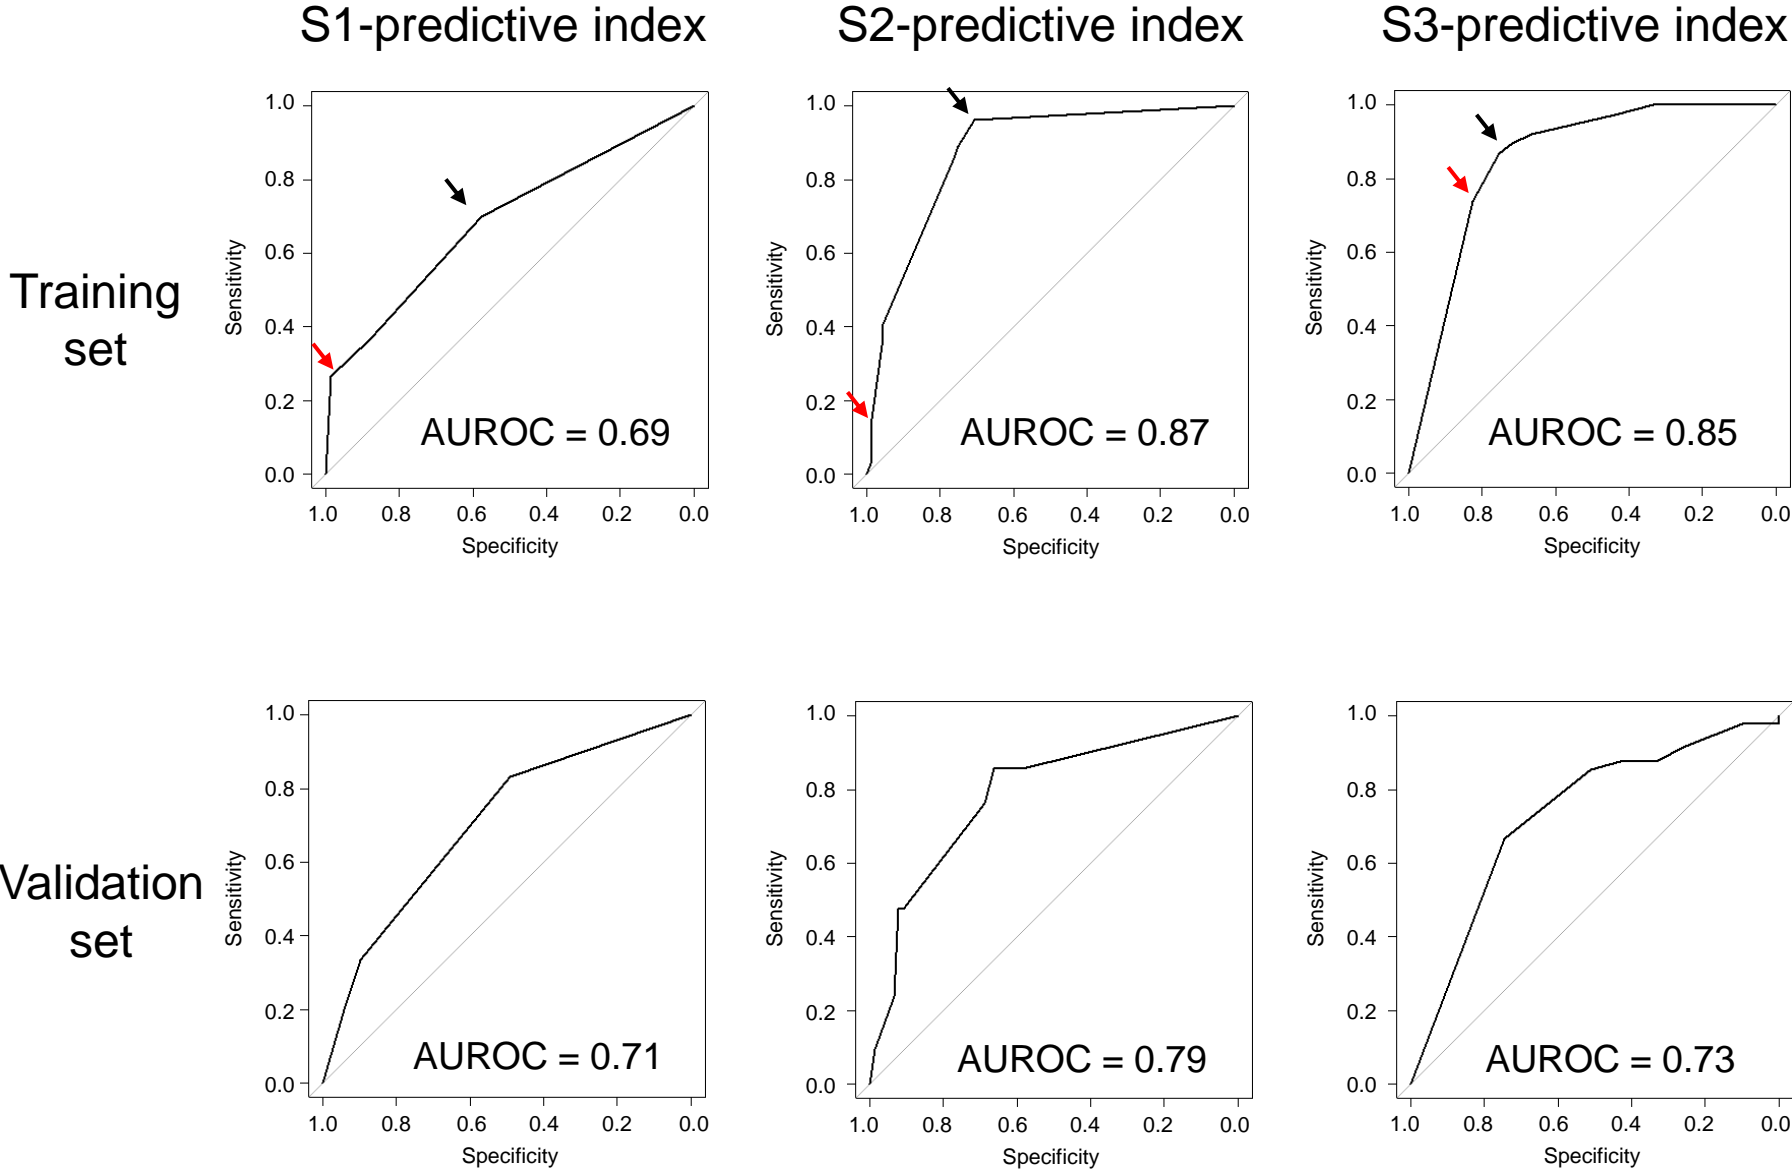

Figure S10

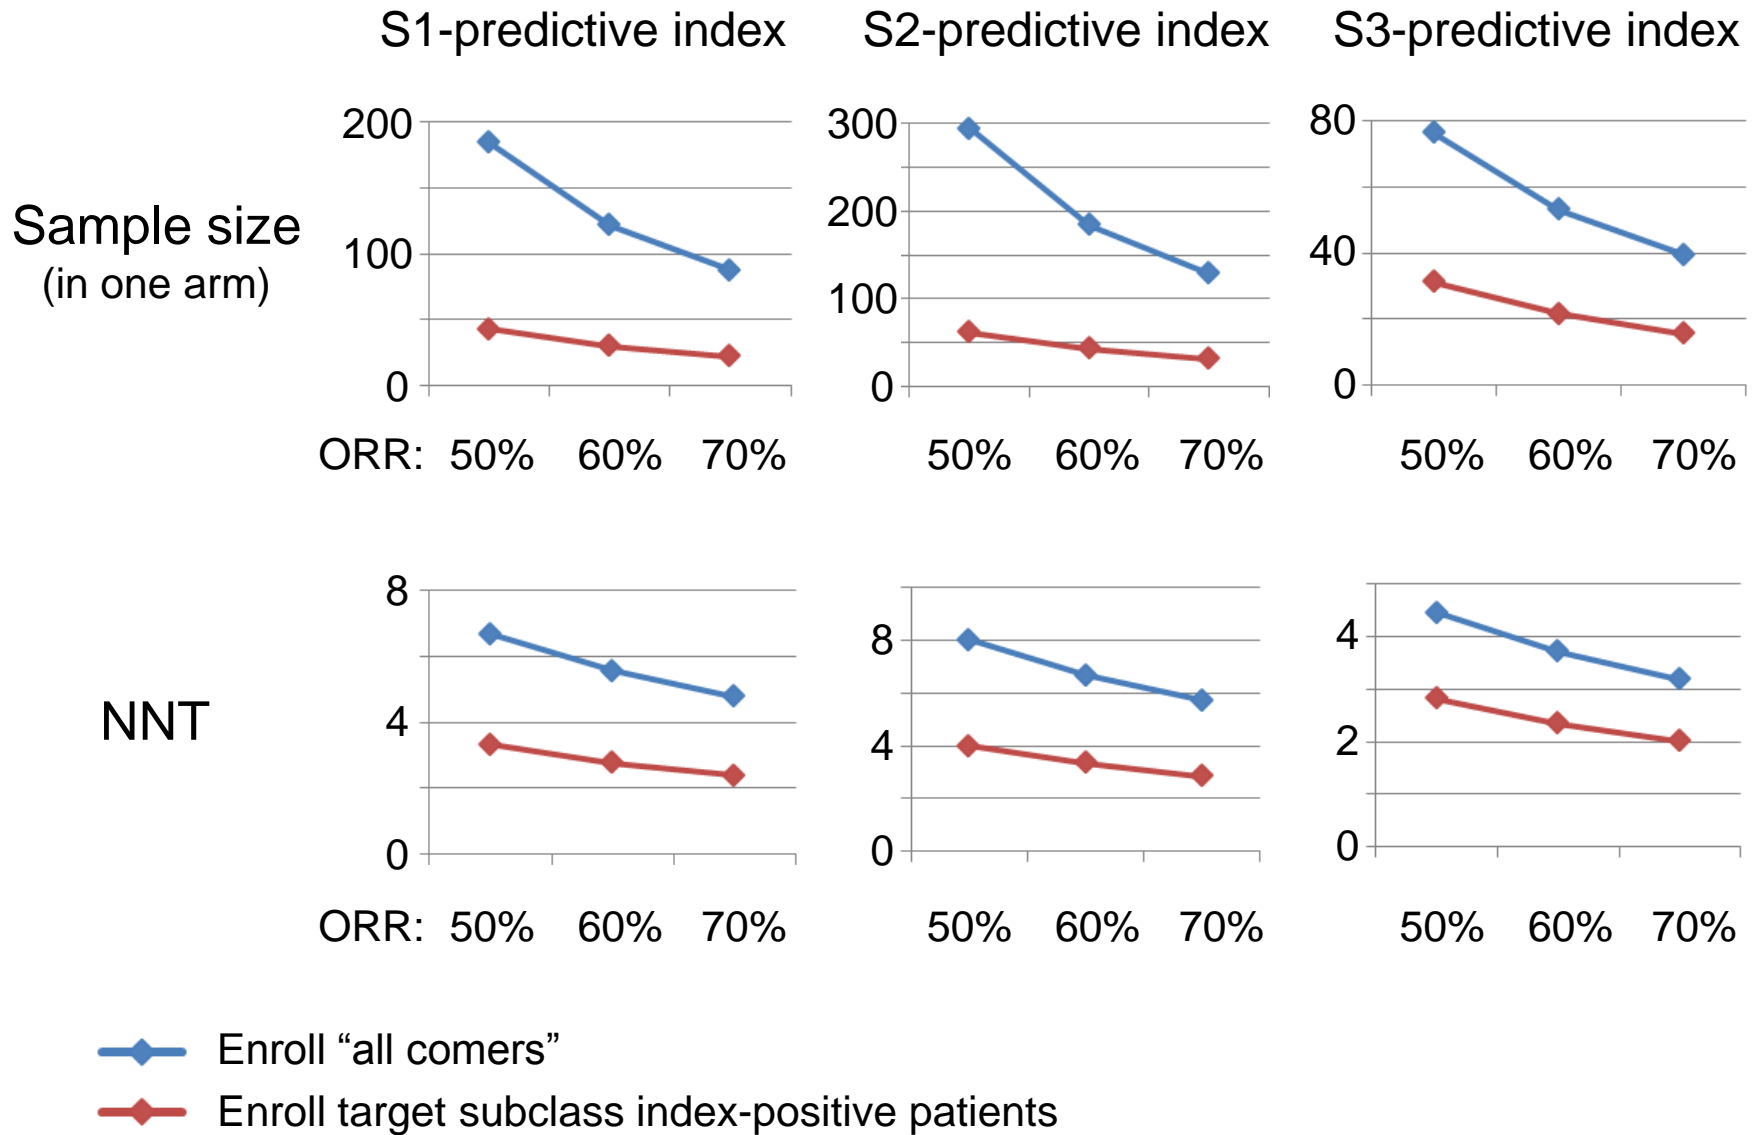

Supplement: NIHMS698797-supplement-Supp_MaterialS1.pdf [file NIHMS698797-supplement-Supp_MaterialS1.pdf]
